1           **Human trophoblast stem cells can be used to model placental susceptibility**  
2           **to *Toxoplasma gondii* and highlight the critical importance of the trophoblast cell**  
3           **surface in pathogen resistance**

4  
5           **Rafaela J. da Silva<sup>1</sup>, Leah F. Cabo<sup>1</sup>, Jada L. George<sup>1</sup>, Laty A. Cahoon<sup>1</sup>, Liheng Yang<sup>2</sup>,**  
6           **Carolyn B. Coyne<sup>2</sup> and Jon P. Boyle<sup>1</sup>**

7           <sup>1</sup>Department of Biological Sciences, Dietrich School of Arts, University of Pittsburgh,  
8           Pittsburgh, PA, USA

9           <sup>2</sup>Department of Integrative Immunobiology, Duke University School of Medicine, NC, USA

10  
11  
12           \*Corresponding author: Jon P. Boyle, University of Pittsburgh, 4249 Fifth Avenue,  
13           Pittsburgh, PA, 15260, Tel: +1 412 624-5842, email address: boylej@pitt.edu

14           **Keywords:** Human trophoblast stem cells, syncytiotrophoblast, cytotrophoblast, *Toxoplasma*  
15           *gondii*, transcriptome, and *Listeria monocytogenes*.

16  
17           **ABSTRACT**

18           The placenta is a critical barrier against viral, bacterial, and eukaryotic pathogens. For most  
19           teratogenic pathogens, the precise molecular mechanisms of placental resistance are still  
20           being unraveled. Given the importance to understand these mechanisms and challenges in  
21           replicating trophoblast-*pathogen* interactions using *in vitro* models, we tested an existing  
22           stem-cell derived model of trophoblast development for its relevance to infection with  
23           *Toxoplasma gondii*. We grew human trophoblast stem cells (TS<sup>CT</sup>) under conditions leading  
24           to either syncytiotrophoblast (TS<sup>SYN</sup>) or cytotrophoblast (TS<sup>CYT</sup>) and infected them with *T.*  
25           *gondii*. We evaluated *T. gondii* proliferation and invasion, cell ultrastructure, as well as for  
26           transcriptome changes after infection. TS<sup>SYNs</sup> cells showed similar ultrastructure compared to  
27           primary cells and villous explants when analyzed by TEM and SEM, a resistance to *T. gondii*  
28           adhesion could be visualized on the SEM level. Furthermore, TS<sup>SYNs</sup> were highly refractory  
29           to parasite adhesion and replication, while TS<sup>CYT</sup> were not. RNA-seq data on mock-treated  
30           and infected cells identified differences between cell types as well as how they responded to

31 *T. gondii* infection. We also evaluated if TS<sup>SC</sup>-derived SYNs and CYTs had distinct  
32 resistance profiles to another vertically transmitted facultative intracellular pathogen, *Listeria*  
33 *monocytogenes*. We demonstrate that TS<sup>SYNs</sup> are highly resistant to *L. monocytogenes*, while  
34 TS<sup>CYT</sup>s are not. Like *T. gondii*, TS<sup>SYN</sup> resistance to *L. monocytogenes* was at the level of  
35 bacterial adhesion. Altogether, our data indicate that stem-cell derived trophoblasts  
36 recapitulate resistance profiles of primary cells to *T. gondii* and highlight the critical  
37 importance of the placental surface in cell-autonomous resistance to teratogens.

38

## 39 INTRODUCTION

40 Congenital infection occurs when a fetus contracts an infection from the mother  
41 during pregnancy. The impact on the developing fetus can vary depending upon factors such  
42 as the gestational age during the infection and the specific pathogen responsible, resulting in  
43 a wide array of outcomes including miscarriage, stillbirth, fetal malformation, and neonatal  
44 death. Pathogens such as *Toxoplasma gondii* and *Listeria monocytogenes* are important  
45 among the major causes of congenital infections and related to several adverse fetal and  
46 neonatal outcomes (1, 2).

47 *Toxoplasma gondii* is an obligatory intracellular protozoan parasite responsible for the  
48 clinical illness toxoplasmosis and is particularly important as a causative agent of disease in  
49 the immunocompromised and pregnant individuals (3, 4). In immunocompetent patients,  
50 toxoplasmosis is generally asymptomatic (5). However, congenital toxoplasmosis, whereby  
51 an immunocompetent mother transmits the parasite to their developing fetus, can be lethal (6,  
52 7). Congenital toxoplasmosis is one of the most severe forms of the disease with primary  
53 infection during pregnancy resulting in miscarriage, stillbirth, premature birth,  
54 malformations, and neurological and/or ocular disorders in newborns (4, 8–10).

55 To reach the fetus and cause congenital toxoplasmosis, *T. gondii* must cross the  
56 barriers protecting the fetus, including the placenta (6, 7, 11). This organ is the primary site of  
57 nutrient and gas exchange between mother and fetus and *T. gondii* is capable of broad  
58 dissemination within the host via the bloodstream, highlighting the importance of encounters  
59 between *T. gondii* and the placenta. The placenta also produces hormones and functions as an  
60 immunological and physical barrier to bloodborne pathogens (2, 12–14). *T. gondii* infection  
61 of the fetus is not the rule and occurs approximately in 40% of pregnant women who are

62 infected for the first-time during gestation (15). It is likely, but yet unproven, that the placenta  
63 protects the fetus from infection in at least some of these cases.

64 Structurally, the placenta is formed by villous trees that are either free-floating and  
65 bathed in maternal blood or anchored in the decidua. The inner layer of each villous tree is  
66 composed of cytotrophoblast (CYT). CYT are mononucleated cells that are responsible for a)  
67 replenishing and growing the protective syncytiotrophoblast (SYN) layer via cell fusion and  
68 b) differentiating into extravillous trophoblast cells (EVT) (2, 16). The SYN layer is made up  
69 of a multinucleated cell that is bathed in maternal blood and present on the outermost surface  
70 of floating villous (2, 17, 18). In contrast, EVTs are mononucleated, mesenchymal cells with  
71 an invasive profile that anchor the placenta in the decidua, where they then interface with  
72 maternal decidual and immune cells (19, 20). The SYN layer is a critical component of fetal  
73 defense and in recent years has been found to be naturally pathogen resistant, including to  
74 viral pathogens like Zika virus (21), bacterial pathogens like *L. monocytogenes* (22, 23) and  
75 parasites like *T. gondii* (18, 24). Our prior work with *T. gondii* using primary human  
76 trophoblasts (18) has shown that SYNs resist *T. gondii* infection by a) being refractory to  
77 parasite adhesion and b) restricting parasite replication and/or being parasiticidal (18, 24, 25).  
78 In contrast, and like nearly all other cell types studied to date, CYTs and EVTs are both  
79 susceptible to *T. gondii* infection (24).

80 The intrinsic mechanisms involved in restricting pathogen growth and invasion by  
81 SYN and mechanisms related to susceptibility of CYT cells to the parasite are poorly  
82 understood. For *T. gondii*, SYNs represent one of the only known cell types that resist *T.*  
83 *gondii* adhesion and restrict its replication without treatment with interferon- $\gamma$ , as this parasite  
84 is capable of infecting and thriving within most nucleated cells. *In vitro* models that faithfully  
85 replicate CYT, SYN and EVT biology are critical for understanding these processes on the  
86 molecular level. While lineages of immortalized trophoblast cells derived from  
87 choriocarcinomas are often used, including BeWo, JEG-3, and JAR, even when they are  
88 syncytialized they do not reproduce the sensitivity of primary trophoblast cells or villous  
89 explants (18, 25). While primary trophoblast cells can differentiate spontaneously into SYN,  
90 they present challenges of their own, in that they are difficult to manipulate genetically due to  
91 their short lifespan *in vitro* (26).

92 In order explore different cellular models to study the placenta cells and pathogens  
93 interactions, we were interested in characterizing and utilizing the human trophoblast stem  
94 cells (TS<sup>CT</sup>), previously isolated and described by Okae and collaborators (27) as a model a  
95 model to elucidate the differential susceptibility to *Toxoplasma* infection. Here we investigate

96 the utility of TS cells to study the genetics of resistance and susceptibility between SYN and  
97 CYT to *T. gondii* and find that they faithfully recapitulate the resistance profile of primary  
98 cells to both *T. gondii* and *Listeria monocytogenes*. We also find that they have important  
99 limitations with respect to their constitutive production of cytokines like interferon- $\lambda$  and  
100 ability to respond to *T. gondii* infection by the production of CCL22 (18, 28).

101

## 102 **MATERIALS AND METHODS**

103

### 104 **Culture of human trophoblast stem cells (TS<sup>CT</sup>)**

105 Trophoblast stem cells (TS<sup>CT</sup>) (clone 27), derived from first trimester placental tissue  
106 were kindly provided by Professor Okae from the Tohoku University, Japan. Cells from this  
107 line were cultured as described previously (27). Briefly, 75 cm<sup>2</sup> flasks were incubated in TS  
108 medium containing 2  $\mu$ g/mL iMatrix-55 (AMSBIO, Abingdon, UK) for 10 minutes at 37°C  
109 in 5% CO<sub>2</sub>. TS medium consist of basal medium (DMEM/F12 (Gibco, Waltham, MA, USA),  
110 1% ITS-X100 (ThermoFisher Scientific, Waltham, MA, US), 0.3% acid fatty free BSA  
111 (Sigma, St Louis, MO, USA), 200  $\mu$ M of ascorbic acid (Sigma), and 0.5% Penicillin-  
112 Streptomycin (ThermoFisher Scientific) and 0.5% of KSR (Gibco), supplemented with 25  
113 ng/EGF (ThermoFisher Scientific), 2  $\mu$ M CHIR99021 (Stemolecule Reprocell USA, Inc,  
114 Beltsville, MD, USA), 5  $\mu$ M A83-01 (Stemolecule Reprocell USA, Inc, Beltsville, MD,  
115 USA), 0.8 mM VPA (APExBIO, Houston, TX, USA) and 5  $\mu$ M Y27632 (Stemolecule  
116 Reprocell USA, Inc, Beltsville, MD, USA). Later, cells were seeded in a ratio of 1:3 and  
117 incubated at 37°C and 5% CO<sub>2</sub>, until they reached 80% confluency. After that, cells were  
118 collected using TrypLE (Sigma) for 10 min at 37°C and passage to a new pre-coated flask.

119

### 120 **Differentiation of cytotrophoblast cells (TS<sup>CYT</sup>) into syncytiotrophoblast cells (TS<sup>SYN</sup>)** 121 **and *T. gondii* infection**

122 To induce syncytiotrophoblast (TS<sup>SYN</sup>) development from TS<sup>CYT</sup> cells, we used both  
123 differentiation protocols as outlined in (27), with minor modifications. Briefly, for a mixed  
124 population of CYTs and SYNs, TS basal medium was supplemented with 5  $\mu$ M Y27632  
125 (Stemolecule Reprocell USA, Inc), while for pure populations of TS<sup>SYN</sup> we used ST (3D)  
126 medium [DMEM/F12 (Gibco), ITS-X100 (ThermoFisher Scientific), 0.3% fatty acid free  
127 BSA (Sigma), 0.5% Penicillin-Streptomycin (ThermoFisher Scientific), 0.1 mM 2-  
128 mercaptoethanol (Fisher Scientific)), supplemented with 2.5  $\mu$ M Y27632 (Stemolecule  
129 Reprocell USA), 2  $\mu$ M Forskolin (Sigma), 4% EGF (ThermoFisher Scientific), and 50 ng/mL

130 KSR (Gibco)]. In both cases, the medium was added in 6-well plates for 10 min at 37°C, and  
131 cells were seeded in a ratio of  $1.5 \times 10^5$  in 6-well plates. For mixed populations, the medium  
132 was replaced on day 3. For TS<sup>SYN</sup> (3D) culture, each well was supplemented with ~2 mL of  
133 ST (3D) media on day 3, and the media was replaced on day 5 with ST (3D) media lacking  
134 forskolin for *T. gondii* infection.

135

### 136 ***Toxoplasma gondii* culture**

137 *Toxoplasma gondii* strain RH (expressing YFP off of the GRA1 promoter) (18) was  
138 cultured in human foreskin fibroblast (HFF) in complete Dulbecco's modified Eagle's  
139 medium (cDMEM; ThermoFisher Scientific plus 100 U/ml penicillin/streptomycin, 100  
140 µg/ml streptomycin, 2 mM L-glutamine, 10% FBS, 3.7 g NaH<sub>2</sub>CO<sub>3</sub>/L) and incubated in 5%  
141 CO<sub>2</sub> and 37°C. For infection assays, infected monolayers were scraped and syringe-lysed to  
142 release tachyzoites, and then, parasites were pelleted at 800 x g for 10 min. For mock  
143 infections, the same parasite preparations were passed through a 0.22 µm filter (Millipore,  
144 Burlington, MA, US) and the eluate was used to treat host cells at the same dilution as the  
145 parasite preparation.

146

### 147 ***Listeria monocytogenes* strains and culture**

148 We used the following *L. monocytogenes* strains: strain 10403S served as the wild  
149 type strain along with isogenic  $\Delta prsA2$  (NF-L1651) (29)  $\Delta hly$  (DP-L2161) (29) strains with  
150 deletions in the *prsA2* and *hly* genes, respectively. We also use *Lm*-GFP (DP-L4092) for  
151 imaging *L. monocytogenes* interactions with placental cells (30). For invasion assays,  
152 bacteria were grown overnight without agitation at 37°C in brain heart infusion broth (BHI;  
153 Oxoid) until an OD<sub>600</sub> of 0.7-0.9 was reached. Bacteria were washed twice and suspended in  
154 cell culture medium without serum and antibiotics for infection experiments.

155

### 156 **General *T. gondii* infection and antibody staining protocol:**

157 Trophoblast stem cells grown under different conditions described above were seeded  
158 in a ratio of  $1.5 \times 10^5$  in 6-well plate, infected or mock infected with *T. gondii* RH: YFP.  
159 TS<sup>CYT</sup> were induced to form TS<sup>SYN</sup> for 4-5 days and then infected with *T. gondii* at different  
160 MOIs depending on the experiment. Cells were collected and evaluated for 24 and 48h post-  
161 infection. For most of 24h infections, TS<sup>SYNs</sup> were infected on day 5 of differentiation at an  
162 MOI of 5 parasites. In both cases the TS<sup>CYT</sup> were infected 1 day after plating, and the mixed  
163 population of trophoblasts were infected in day 3 of differentiation. Cell passages were

164 staggered so that the same parasite preparation could be used to infect TS<sup>SYN</sup> and TS<sup>CYT</sup>  
165 simultaneously.

166 To evaluate on which day of differentiation TS<sup>SYN</sup> becomes resistant to *T. gondii*  
167 infection, TS<sup>SYN</sup> cells were plated in 6-well plates in duplicate and infected with the parasite  
168 every day from day 1 to day 6. The parasites were allowed to grow for 24h for each time  
169 point and then, the cells were fixed and processed for immunofluorescence.

170 For immunofluorescence assay, cells were fixed using 4% paraformaldehyde (PFA)  
171 (ThermoFisher Scientific) for 12 min, rinsed with PBS (ThermoFisher Scientific) and  
172 permeabilized with 0.2% Triton X-100 in PBS for 10 min. Cells were then incubated with the  
173 TS<sup>SYN</sup> marker anti-Syndecan-1 (SDC-1) (1:500) (ab128936, Abcam, Cambridge, UK) and  
174 TS<sup>CYT</sup> marker, anti-Integrin  $\alpha$ -6 (ITGA6) (1:1000) (MA5-16884, ThermoFisher Scientific)  
175 for 1 h at room temperature. Alexa Fluor 594 and 647- conjugated (A-21209 and A-32733,  
176 Life Technologies Alexa Fluor H+L, Carlsbad, CA, USA) were used as secondary antibodies  
177 for 45 min.

178

### 179 ***Listeria monocytogenes* infection and gentamicin survival assay**

180 TS<sup>SYNs</sup> and TS<sup>CYT</sup>s were cultured in 6-well plates and *L. monocytogenes* wildtype,  
181  $\Delta$ *prsA2* or  $\Delta$ *hly* was used to infect cells in triplicate at  $8 \times 10^6$  bacteria per well. As a control,  
182 a mock infection was performed using 0.2  $\mu$ m-filtered *L. monocytogenes* culture supernatant.  
183 Inoculated cells were incubated for 1 hour at 37°C with 5% CO<sub>2</sub>. Cells were then washed  
184 with fresh cell culture media and incubated for 7 hours with gentamicin (5  $\mu$ g/ml). Two  
185 washes were performed with 1x PBS and cells were lysed by incubation with 0.25% Triton  
186 X-100 for 5 min at RT followed by plating of serial dilutions of the cell lysates on BHI agar  
187 plates. Plates were incubated at 37°C for 36 hours after which bacteria were enumerated and  
188 colony forming units were calculated. TS<sup>SYN</sup> and TS<sup>CYT</sup> cells were also collected for  
189 immunofluorescence assay as described above and for TEM.

190

### 191 **RT-qPCR**

192 To quantify the number of parasites in TS<sup>SYN</sup> and TS<sup>CYT</sup>, cells were infected with *T.*  
193 *gondii* at an MOI of 5 parasites for 24h. After that, genomic DNA was extracted using the  
194 GeneJet Genomic DNA Purification kit following manufacturer's instructions (ThermoFisher  
195 Scientific). qPCR was used to quantify the total number of genomes using primers targeting  
196 the *T. gondii* GRA1 gene and primers targeting human  $\beta$ -ACTIN as a control gene. All  
197 reactions were performed in triplicate using a QuantStudio 3 Real-Time PCR System



198 (ThermoFisher). The DNA was mixed with SYBR Green buffer (BioRad, Hercules, CA,  
199 USA) and 1  $\mu$ L (5  $\mu$ M) of both forward and reverse primers and ddH<sub>2</sub>O. Genes were  
200 amplified using a standard protocol (95°C for 10 min and 40 cycles of 95°C for 15 sec and  
201 60°C for 1 min) and data was analyzed with QuantStudio™ Design & Analysis Software. To  
202 determine the total number of parasite genomes, a standard curve of known parasite numbers  
203 ranging from  $1 \times 10^7$  to  $1 \times 10^1$  was also performed using *T. gondii* GRA1 primers.

204 *T. gondii* GRA1 forward: TTAACGTGGAGGAGGTGATTG; GRA1 reverse:  
205 TCCTCTACTGTTTCGCCTTTG, and human  $\beta$ -ACTIN forward:  
206 GCGAGAAGATGACCCAGATC; human  $\beta$ -ACTIN reverse:  
207 CCAGTGGTACGGCCAGAGG. Two experiments in triplicate were performed.

208 To quantify the expression level of IL-1 $\beta$  in cells infected and mock infected with *L.*  
209 *monocytogenes*, and the RNA were extracted using the Qiagen RNA extraction kit following  
210 manufacturer's instructions (Qiagen, Hilden, Germany). RNA was analyzed by gel  
211 electrophoresis and quantified by Nanodrop. cDNA was generated from 0.5  $\mu$ g of RNA using  
212 the SuperScript IV First-Strand synthesis system (ThermoFisher Scientific). IL-1 $\beta$  forward:  
213 CTCTCACCTCTCCTACTCACTT; IL-1 $\beta$  reverse: TCAGAATGTGGGAGCGAATG. And  
214  $\beta$ -ACTIN was used as a reference gene. DeltaCt values (query gene Ct – control gene Ct)  
215 were used for statistical comparisons and then converted to fold-difference using the  $2^{-\Delta\Delta Ct}$   
216 method. One experiment in triplicate was performed.

217

### 218 **Transcriptional analysis of TS<sup>CYT</sup> and TS<sup>SYN</sup> using RNAseq**

219 TS<sup>SYN</sup> and TS<sup>CYT</sup> cells were seeded and infected in the same conditions as described  
220 above for qPCR, and RNA was extracted to perform RNAseq. Strand-specific, oligo-dT  
221 generated sequencing libraries were prepared at Core Facility at the University of Pittsburgh  
222 and 2x 66 bp reads were sequenced on a NextSeq 200 (Illumina). Read libraries were mapped  
223 to the human (hg38) transcriptomes using CLC Genomics Workbench v.23.0. Raw read  
224 counts were analyzed using the DESeq2 package implemented in R (31) using default  
225 settings to identify transcripts of significantly different abundance. These data were also used  
226 to calculate relative log<sub>2</sub>-fold change values across cell type and infection parameter, and  
227 these data were fed into pre-ranked Gene Set Enrichment Analysis (GSEA) to identify host  
228 gene sets that were negatively or positively enriched. One experiment with three replicates  
229 was performed. Fastq files have been deposited in the NCBI Short Read Archive (accession  
230 numbers pending).

231

## 232 **Luminex assay**

233 To evaluate the cytokine and chemokine profile secreted by TS<sup>CYT</sup> and TS<sup>SYN</sup> infected  
234 or mock infected with *T. gondii*, supernatants were collected from those cells Luminex assay  
235 was performed using the following kits according to the manufacturer's instructions: Bio-  
236 Plex Pro Human Inflammation Panel 1, 37-Plex kit (171AL001M; Bio-Rad) Bio-Plex Human  
237 Chemokine Panel, 40-plex (171AK99MR2; Bio-Rad).

238 In order to verify the CCL22 production in response to the infection with *T. gondii* in  
239 a different system to compare to our data with TS cells, we performed an experiment using  
240 trophoblast organoids (line TO74) (32). TOs were cultured as described previously (32), and  
241 for infection, they were removed from the Matrigel "dome" and maintained in suspension.  
242 Then, TOs were infected with  $1 \times 10^6$  *T. gondii* tachyzoites (RH-YFP) for 24h. As a control,  
243 TOs were mock infected with the parasite. The supernatants from infected and control  
244 conditions were collected and the levels of CCL22 were measured by Luminex (40-plex  
245 171AK99MR2; Bio-Rad).

246

## 247 **Transmission and Scanning microscopy**

248 For transmission electron microscopy (TEM), TS<sup>CYT</sup>s and TS<sup>SYNs</sup> were infected or not  
249 with *T. gondii* RH: YFP for 24h or *L. monocytogenes* wildtype for 8 h. TS<sup>CYT</sup>s were fixed  
250 with 2.5% glutaraldehyde in PBS for 1 hour at room temperature and washed once with PBS.  
251 Meanwhile, TS<sup>SYNs</sup> were pelleted, and the samples were kept into 2.5% glutaraldehyde. They  
252 were processed by the Center of Biological Imaging-CBI at the University of Pittsburgh.  
253 Briefly, the samples were incubated for 1 hour 4°C in 1% OsO<sub>4</sub> with 1% potassium  
254 ferricyanide and washed three times with 1x PBS. Then, they were dehydrated in a graded  
255 series of alcohol for ten minutes with three changes in 100% ethanol for 15 minutes and  
256 changed three times in epon for 1 hour each. Following the removal of epon, samples were  
257 covered with resin and polymerized at 37°C overnight and then 48 hours at 60°C. After the  
258 samples were cross sectioned, they were imaged using the JEOL 1400-Plus microscope.

259 For scanning electron microscopy (SEM), TS<sup>CYT</sup>s and TS<sup>SYNs</sup> were infected with *T.*  
260 *gondii* for 2 h, washed twice with PBS, and the samples were fixed as described above and  
261 processed by CBI facility. Images were taken using the JSM-6335F microscope.

262

## 263 **Statistical Analysis**

264 Statistical analyses (besides those on RNAseq data which were described above) were  
265 performed using GraphPad Prism 9.0 (La Jolla, CA, USA). Differences between conditions



266 were assessed by one-way ANOVA followed by the Bonferroni multiple comparison *post-*  
267 *hoc* test for parametric samples, or Kruskal Wallis followed by Dunn's multiple comparisons  
268 for a non-parametric, by two-way ANOVA, or by *t*-test for parametric samples or Mann-  
269 Whitney for non-parametric, if comparing only two groups.

270

## 271 RESULTS

272

### 273 Syncytiotrophoblasts are more resistant to *T. gondii* infection than cytotrophoblasts

274 TS<sup>CYT</sup> cells were cultured and differentiated into TS<sup>SYN</sup> cells as described previously  
275 (27) and we quantified the success of differentiation using the TS<sup>SYN</sup> marker SDC-1 (27) and  
276 the TS<sup>CYT</sup> marker ITGA-6. We found that cells in "CYT" conditions were negative for SDC-  
277 1, as expected (**Fig. 1A and 1B**), while ~90% of those cells cultured in 3D SYN conditions  
278 expressed SDC-1 and therefore were likely TS<sup>SYNs</sup> (**Fig. 1A and 1B**). When TS medium was  
279 supplemented only with Y27632, this resulted in a mixed population of ~45% TS<sup>CYT</sup> and  
280 55% TS<sup>SYN</sup>-like cells (**Fig. 1A and 1B**). These data indicated that we were able to recapitulate  
281 the differentiation procedure described previously (27).

282 To further validate the differentiation process in our laboratory we used RNAseq and  
283 first focused on transcript levels for SYN markers (CGB1, CGB2, CGB7, CGB5, CGB3,  
284 CGB8 and SDC-1) and the CYT marker ITGA-6. TS<sup>SYN</sup> cells in 3D medium had  
285 significantly higher transcript abundance for SDC-1 and members of the *CGB* gene family,  
286 and significantly lower levels of ITGA-6 (**Fig. 1C**), while TS<sup>CYT</sup> cells had significantly  
287 higher levels of ITGA-6 transcript and significantly lower levels of SDC-1 and *CGB* family  
288 member transcripts (**Fig. 1C**). These data suggest that we were able to generate TS<sup>SYN</sup> cells  
289 and indicated that 3D medium was the most efficient protocol to generate TS<sup>SYN</sup> cells as  
290 previously described (27).

291 We also performed TEM and SEM to evaluate differences in ultrastructure between  
292 TS<sup>CYT</sup>s and TS<sup>SYNs</sup>. Transmission electron microscopy revealed that TS<sup>CYT</sup>s have large  
293 amounts of glycogen granules and lipid droplets scattered in the cytoplasm while this is not  
294 seen in TS<sup>SYNs</sup> (**Fig. 1D**). We also could observe the differences in mitochondria  
295 morphologically, similar to what described by (33). TS<sup>CYT</sup>s have larger mitochondria with a  
296 lamellar crista (**Supplementary fig. 1A, B**) while TS<sup>SYNs</sup> have smaller mitochondria  
297 containing vesicular cristae (**Supplementary fig.1 C-D**). Scanning electron microscopy  
298 shows that the surface of TS<sup>SYN</sup> is densely covered by microvilli while microvilli in TS<sup>CYT</sup>s,

299 was much more diffuse (**Fig.1E**) These findings indicate that TS<sup>CYT</sup>s and TS<sup>SYNs</sup> generated in  
300 our hands bear all of the expected characteristics.

301         Given the known resistance of SYNs to *T. gondii* infection compared to CYTs in both  
302 primary human trophoblast (PHT) cells and placental explants (18, 24), we used trophoblast  
303 stem cells to generate TS<sup>SYNs</sup> and compare their sensitivity to *T. gondii* infection with TS<sup>CYT</sup>s.  
304 We generated pure TS<sup>CYT</sup>, TS<sup>SYN</sup> (3D) and cultures of mixed TS<sup>CYT</sup>s and TS<sup>SYNs</sup> and infected  
305 them with RH: YFP parasites with an MOI of 5 for 24 h. Qualitatively, images of infected  
306 TS<sup>CYT</sup>s and TS<sup>SYNs</sup> show dramatic differences in *T. gondii* numbers that have infected each  
307 cell type, with TS<sup>CYT</sup> cells being much more susceptible to parasite infection compared to  
308 TS<sup>SYN</sup>. (**Fig. 1F**). Using qPCR for the *T. gondii* gene *GRA1* as a proxy for parasite number,  
309 based on a standard curve, we found that the parasite burden was higher in TS<sup>CYT</sup> cells  
310 compared to TS<sup>SYN</sup> ( $P = 0.0001$ ) (**Fig. 1E**), further supporting the reduced number of *T.*  
311 *gondii* associated with TS<sup>SYN</sup> compared to TS<sup>CYT</sup>. These data suggest that TS<sup>SYNs</sup> are  
312 similarly resistant to *T. gondii* as those generated during the culture of placental explants and  
313 primary human trophoblast cells (18, 24).

314

#### 315 **TS<sup>SYNs</sup> become resistant at day 4 of differentiation**

316         To generate a pure population of TS<sup>SYNs</sup> we induce the differentiation for 6 days using  
317 the ST 3D medium. Given that, we want to evaluate on which day of differentiation the cells  
318 would become resistant to *T. gondii* infection. Cells were plated in duplicate and infected on  
319 day 1, the same day they were plated, and on the following days until day 6. Cells were  
320 collected after 24 h of infection and the total of vacuoles size was calculated per cell in a  
321 field of view. Our data shows that from day 1 to day 3 of differentiation the cells are still  
322 susceptible to infection and the parasite is able to proliferate intracellularly. However, from  
323 day 4 the cells become resistant compared to day 1 ( $P = 0.03$ ) (**Fig. 2A**). There is no  
324 significant difference between day 4, day 5 and day 6. Representative images show the  
325 progression of the differentiation with the SDC-1 staining and the formation of the  
326 multinucleated cells over time. We also can see the large number of *T. gondii* vacuoles in the  
327 cells in day 1 of differentiation when compared to days 4, 5 and 6 (**Fig. 2B**).

328

#### 329 ***T. gondii* growth is restricted in TS<sup>SYN</sup>**

330         A limitation of PHT cells is their short (2-4 days) cultivation time *in vitro*, making  
331 long-term quantification of *T. gondii* growth very challenging. Given the longer survival  
332 times of TS<sup>SYNs</sup> derived from trophoblast stem cells, we used this model to assess parasite

333 growth in TS<sup>SYNs</sup> and TS<sup>CYT</sup>s over a 48h period. To do this we infected TS<sup>CYT</sup> and TS<sup>SYN</sup>  
334 (3D) with *T. gondii* at an MOI of 1.5 and quantified parasite abundance using  
335 immunofluorescence at 24, and 48 h post-infection. As expected, *T. gondii* numbers  
336 significantly increased at each time point in TS<sup>CYT</sup> cells ( $P < 0.0021$ ) (**Fig. 3A, B**) and had  
337 significantly higher numbers of parasites compared to TS<sup>SYNs</sup> at each time point (**Fig. 3A, B**).  
338 In contrast, parasite numbers did not significantly change over the course of the experiment  
339 in TS<sup>SYNs</sup>, suggesting that, similar to PHT cells (18) TS<sup>SYNs</sup> restrict *T. gondii* replication (**Fig.**  
340 **3A, B**). The TEM was performed in infected TS<sup>CYT</sup>s and TS<sup>SYNs</sup> with *T. gondii* to evaluate the  
341 differences in parasite growth and health at the ultrastructural level. The TEM photos  
342 demonstrate that the parasite grows normally in TS<sup>CYT</sup>s, showing a huge vacuole containing  
343 normally more than 6 health tachyzoites inside (**Fig. 4A, B**). The parasites present the normal  
344 tachyzoites morphology with characteristic organelles, but in TS<sup>SYNs</sup>, the TEM pictures  
345 reveal unhealthy parasites, showing few tachyzoites per vacuole and malformation  
346 tachyzoites of *T. gondii* after 24h of infection, observed by abnormal morphology, seems to  
347 be dead parasites (**Fig. 4C, D**).

348

#### 349 **TS<sup>SYNs</sup> recapitulate the SYN-specific resistance of primary cells to *T. gondii* invasion**

350 Since our prior work also established that SYNs from primary human trophoblasts  
351 were poorly invaded by *T. gondii*, we counted the total number of vacuoles present in each  
352 cell per field of view after 24 h post infection as a proxy of invasion rate in TS<sup>CYT</sup>s and  
353 TS<sup>SYNs</sup>. A significantly higher number of parasite vacuoles were found in TS<sup>CYT</sup> cells  
354 compared to TS<sup>SYN</sup> cells per field of view ( $P = 0.0004$ ) (**Fig. 5A**), indicating that *T. gondii*  
355 invaded more TS<sup>CYT</sup>s compared to TS<sup>SYNs</sup>. This phenotype recapitulates what was observed  
356 previously in PHT cells (18). Specifically, fewer parasites invaded TS<sup>SYNs</sup> compared to  
357 TS<sup>CYT</sup>s.

358

#### 359 **TS<sup>CYT</sup>s and TS<sup>SYNs</sup> exhibit low production of immunoregulatory factors compared to** 360 **PHTs**

361 In addition to differences in susceptibility to *T. gondii* compared to many other cell  
362 types, PHTs, human placental villous explants and trophoblast organoids produce different  
363 cytokines, chemokines and growth factors that are important for pregnancy maintenance and  
364 fetus defense (2, 32). Previous work has shown that CCL22 is produced by PHTs and villi in  
365 response to *T. gondii* infection while other cell types such as HFFs do not (18). We quantified  
366 77 chemokines and cytokines using multianalyte Luminex-based profiling in supernatants of

367 mock- and infected cells to evaluate the immunomodulatory secretome of TS<sup>CYT</sup>s and TS<sup>SYN</sup>s.  
368 Even though TS cells recapitulate the resistance profile to *T. gondii* infection, the cells do not  
369 recapitulate the immune response to infection observed in villous explants and PHT cells. In  
370 our data we defined as reliably secretion factors measured above 100 pg/mL as baseline. We  
371 found that both TS<sup>CYT</sup>s and TS<sup>SYN</sup>s did not secrete CCL22 when infected with *T. gondii* (**Fig.**  
372 **7A, B and C**). In contrast, when we infected trophoblast organoids (TOs), we detected a  
373 clear induction of CCL22 secretion compared to mock-infected organoids (**Fig. 7D**). Our data  
374 also show that TS<sup>CYT</sup>s in both secrete cytokines as (MIF, IL-11 and gp130), factors  
375 (TNFRSF8, Pentraxin-3, TNFRSF8 and MMP-1), and two soluble factors (TNF-R1 and  
376 OPN) (Fig.7A). In other hand, TS<sup>SYN</sup>s only secrete detectable amounts of two soluble factors  
377 (OPN and TNF-R2) and one cytokine (MIF) (**Fig.7B**). Interestingly, we observed that the  
378 soluble factor OPN presents a significant low levels of secretion in TS<sup>SYN</sup>s after infection  
379 when compared with TS<sup>CYT</sup>s infected (**Fig. 7A, B and D**), and the cytokine MIF was highly  
380 produced by TS<sup>CYT</sup>s and TS<sup>SYN</sup>s in both conditions (**Fig. 7A, B and F**), however the infection  
381 with *T. gondii* induce significantly higher levels of this cytokine compared to the mock  
382 conditions, and infected TS<sup>SYN</sup>s also release more MIF when compared to TS<sup>CYT</sup>s (**Fig. 7A, B**  
383 **and F**).

384 Overall, our data show that trophoblast stem cells do not release many of the  
385 immunomodulatory compounds that are secreted by PHTs, highlighting that these cells do  
386 not recapitulate the similar immunological profile of PHTs and placenta explants. This  
387 model, then, allows us to separate immune effector and signaling molecule production from  
388 innate cellular resistance that develops during the transition from CYT to SYN.

389

### 390 ***T. gondii*-infected TS<sup>SYN</sup> and TS<sup>CYT</sup> have distinct transcriptomes**

391 Another disadvantage of the PHT cell model is that the cultures are a mixed  
392 population of CYTs, SYNs, and also contain contaminating fibroblasts (18, 21, 34). The TS  
393 model described here provided a unique opportunity to observe the transcriptional response to  
394 infection in pure populations of cells that bear biological similarity to naturally occurring  
395 CYTs and SYNs (18, 27). After infecting TS<sup>CYT</sup> and TS<sup>SYN</sup> for 24 h with *T. gondii* RH: YFP,  
396 we performed strand specific RNAseq to compare the transcriptional responses of each of  
397 these cell types. We first used principal component analysis (PCA) to broadly examine  
398 sample-by-sample differences in the presence and absence of *T. gondii*. Two major principal  
399 components were identified. PC1 encompassed 96% of the total variance with cell type  
400 (TS<sup>SYN</sup> or TS<sup>CYT</sup>) varying primarily along this axis (**Fig. 8A**). The bulk of the remaining

401 variance (3% out of 4%) was accounted for by infection state (mock or infected; **Fig. 8A**).  
402 These data confirm that TS<sup>CYT</sup>s and TS<sup>SYNs</sup> are transcriptionally distinct, as expected from  
403 prior transcriptional studies on these cell types (27). One surprise in these data was that the  
404 impact of infection on the TS<sup>CYT</sup> and TS<sup>SYN</sup> transcriptomes was similar between these cell  
405 types, despite the dramatic difference in parasite infectivity (e.g., **Fig. 1F** and **1G**; **Fig. 3A**  
406 and **3B**). While we explore this further below by examining the specific sets of genes with  
407 altered transcript levels under each condition, this was a surprising result given that many of  
408 the well-known alterations in the host transcriptional profile requires parasite invasion and/or  
409 parasite attachment to the host cell along with the secretion of host modulatory effectors (35,  
410 36).

411 All transcripts and those of significantly different abundance based on DESeq2  
412 analysis ( $P_{adj} < 0.05$ ;  $|\log_2\text{fold-difference}| > 2$ ) are shown in the MA-plots (log fold-  
413 difference vs average abundance for each transcript) in **Fig. 8B-8D**. As shown in **Fig. 8B** and  
414 **8C**, MA plots comparing infection in both TS<sup>SYN</sup> and TS<sup>CYT</sup> have similar shapes and profiles,  
415 and but more significantly different transcript abundances are seen in in TS<sup>CYT</sup>s after  
416 infection, compared to TS<sup>SYNs</sup>. A unique feature of the SYN is its ability to resist *T. gondii*  
417 infection (18, 24) without prior exposure to activating cytokines like interferon  $\gamma$ . Given that  
418 TS<sup>SYNs</sup> recapitulate this phenotype, we aimed to identify putative host resistance genes that  
419 might be either constitutively expressed in TS<sup>SYNs</sup> compared to TS<sup>CYT</sup>s and other susceptible  
420 cell types or induced by *T. gondii* infection uniquely in TS<sup>SYNs</sup>. Our data show that some  
421 genes involved in proinflammatory or autophagic response are of significantly greater  
422 abundance in TS<sup>SYN</sup> compared to TS<sup>CYT</sup> in both mock-treated and infected cells, including  
423 *PAPPA*, *CARD17*, *TREM1*, *TMED7-TICAM2*, *BATF*, *SLC11A1*, *IL27*, *ISG20*, *MAK8 IP2*,  
424 *MAP1LC3B*, *LAMP3*, *IL16*, *CASP1P2*, *CASP4*, *TRIM55*, *ARNT* and *EIF2AK2* (**Fig. 8E**).

425 Using GSEA on our RNAseq dataset comparing TS<sup>SYN</sup> mock versus TS<sup>CYT</sup> mock  
426 identified 23 “Hallmark” pathway gene sets (FDR-q value  $< 0.01$ ) (**Fig. 8F**). Interestingly,  
427 the pathways *IFN $\alpha$ -* and *IFN $\gamma$ -response* were both significantly enriched in uninfected  
428 (“mock”) TS<sup>SYN</sup> compared to uninfected TS<sup>CYT</sup>. All the other significant pathways are  
429 significantly downregulated in TS<sup>SYNs</sup> compared to TS<sup>CYT</sup>s, for example, *fatty acid*  
430 *metabolism*, *MTORC1 signaling*, *apical surface*, *glycolysis*, *P53 pathway*, *epithelial*  
431 *mesenchymal transition*, *MYC target V1 and V2*, *apical junction and E2F targets* (**Fig. 8F**).  
432 This is consistent with a distinct response of these cell types to infection as would be  
433 expected given the dramatic differences in their transcriptional profiles (**Fig. 8A** and **8D**).

434

435 **TS<sup>SYNs</sup> recapitulate resistance to *Listeria monocytogenes* infection compared to TS<sup>CYT</sup>s**

436 In effort to characterize how TS<sup>SYN</sup> resist infection of other teratogens besides *T.*  
437 *gondii*, we tested susceptibility of the cells to the congenital pathogen *L. monocytogenes*  
438 (*Lm*). When infected with WT *Lm*, far fewer CFUs are recovered from TS<sup>SYN</sup> compared to  
439 TS<sup>CYT</sup> (**Fig. 9A**). We observed the same deficit in recovered CFUs when TS<sup>SYN</sup> and TS<sup>CYT</sup>  
440 infected with *Lm*  $\Delta$ *prsA2*. PrsA2 is a secreted protein chaperone that is required for the  
441 activity of several secreted *Lm* virulence factors and, here, produces an intermediate  
442 phenotype (**Fig. 9A**) (37, 38). Finally, there is no significant difference in CFUs recovered  
443 from TS<sup>SYNs</sup> compared to TS<sup>CYT</sup>s infected with *Lm*  $\Delta$ *hly* (encodes listeriolysin O, LLO). LLO  
444 is a pore-forming toxin that is required for bacterial escape from the host cell vacuole which  
445 allows for intracellular growth and infection of neighboring cells (**Fig. 8A**)(39). The use of  
446 three *Lm* genotypes here depicts a spectrum of permissiveness in TS<sup>CYT</sup>s whereas TS<sup>SYNs</sup>  
447 entirely restrict *Lm* infection and persistence no matter what *Lm* genotype.

448 Confocal imaging of GFP-tagged *Lm* infecting either TS<sup>CYT</sup> or TS<sup>SYN</sup> (**Fig. 9B**)  
449 mirrors the differences in recovered CFUs depicted for the WT strain (**Fig. 9A**). We see more  
450 *Lm* attached and internalized by TS<sup>CYT</sup> compared to TS<sup>SYN</sup>. The *Lm* located in TS<sup>SYN</sup> appears  
451 primarily associated with the cell membrane but not intracellular. This distinction is seen  
452 clearly in **supplementary video 1** as there are no visible intracellular *Lm* in the 3D  
453 reconstruction of TS<sup>SYN</sup> infected with GFP-tagged *Lm*. In TS<sup>CYT</sup> there are more GFP-tagged  
454 *Lm* both associated with the membrane and intracellular. This is visible in **supplementary**  
455 **video 2** of TS<sup>CYT</sup> infected with GFP-tagged *Lm*, especially in contrast to TS<sup>SYN</sup>.

456 Previous work has shown that placental trophoblast constitutively secretes the  
457 inflammasome cytokines as IL-1 $\beta$  and IL-18, and the infection with *L. monocytogenes* can  
458 also induces more activation of this pathway, leading to resistance against the bacteria  
459 infection (23). Due to that, we evaluate the gene expression level of some important  
460 constituents of the inflammasome pathway, and we identified those genes are expressed in  
461 low abundance in both cells TS<sup>CYT</sup>s and TS<sup>SYNs</sup> (**Fig. 9C**). We also measured the gene  
462 expression level of IL-1 $\beta$  in infected cells with *L. monocytogenes*, and the infection in both  
463 cells does not induce the gene expression of this cytokine when compared to the respective  
464 mock conditions (**Fig. 9D, E**).

465 We also performed TEM in TS<sup>CYT</sup>s and TS<sup>SYNs</sup> infected with *Lm*. The representative  
466 EM photos confirm the data found in the confocal imaging (**Fig. 9B**), in which most of the  
467 *Lm* was associated to the cell membrane of TS<sup>SYNs</sup>; however, in TS<sup>CYT</sup>s *Lm* are successfully  
468 internalized and grow intracellularly (**Fig. 10A-10D**).



469 **DISCUSSION**

470 Here we describe a new *in vitro* system developed (27) to study placenta-pathogen  
471 interactions evaluating the differential susceptibility of TS<sup>SYNs</sup> and TS<sup>CYT<sub>s</sub></sup> against *T. gondii*.  
472 The architecture of placenta villous explants, comprised primarily of trophoblast cells, is  
473 associated with safeguarding of the fetus against potential maternal bloodborne microbes, but  
474 the mechanisms underlying the resistance profile is still poorly understood (2, 16).

475 Nearly all mammalian cells studied to date can be infected with *T. gondii* and support  
476 rapid *T. gondii* replication, unless they are made resistant by exposure to effector cytokines  
477 like interferon- $\gamma$ . However placental syncytiotrophoblasts are an exception to this rule, having  
478 clear innate resistance to *T. gondii* that has been demonstrated in multiple primary placental  
479 models including villous explants and primary human trophoblast (PHT) cells (18, 24). The  
480 mechanisms involved in SYN resistance to parasite adhesion and ability to restrict parasite  
481 growth are unknown (16, 18), and a significant barrier to elucidating these mechanisms are  
482 genetically tractable and reproducible models of CYT and SYN development. Overall, our  
483 data provide evidence that TS-derived CYTs and SYNs recapitulate the susceptibility and  
484 resistance phenotypes that we and others have previously characterized. Most notably, TS<sup>SYNs</sup>  
485 resist *T. gondii* infection at the level of both adhesion and replication, which is identical to  
486 what we have observed previously using mixed CYT and SYN cultures derived from term  
487 placentas (18). This same dichotomy is observed in midgestational chorionic villi (18, 40).  
488 Additionally, another study using villous explants from the first trimester showed that SYN  
489 act as a strong barrier against *T. gondii*, since these cells were also very resistant to infection  
490 (24).

491 Mechanisms of SYN resistance to a variety of pathogens seems to depend on the  
492 infection model. Our data showed that besides the resistance against *T. gondii* infection,  
493 TS<sup>SYNs</sup> also were resistant to *L. monocytogenes*, mainly by restricting the bacterial entry into  
494 the cells. Looking at *L. monocytogenes* and *T. gondii* infection, we can observe that TS<sup>SYNs</sup>  
495 are very resistant to pathogen invasion/entry, similar to what is shown in SYNs from PHTs  
496 and villous explants (18, 22, 41). SYNs lack intracellular junctions, which some bacterial and  
497 viral pathogens use to invade cells (42, 43). They also have a robust cytoskeletal network and  
498 branched microvilli that might inhibit pathogen entry, and in fact are highly resistant to *T.*  
499 *gondii* adhesion, a required first step for *T. gondii* to ultimately infect a mammalian cell (18).  
500 Our work here shows a clear difference in the density of the microvilli between TS<sup>SYNs</sup> and  
501 TS<sup>CYT<sub>s</sub></sup>, in which the cell surface of TS<sup>SYNs</sup> is highly density covered by microvilli while in  
502 TS<sup>CYT<sub>s</sub></sup> is not. SEM photos from both infected cells for 2 h clearly show more parasites that

503 invade TS<sup>CYT</sup>s (**Fig. 6A-6D**), and in TS<sup>SYN</sup>s, *T. gondii* seems to be attached to the membrane,  
504 but rarely invades the cells in the same time frame as compared to TS<sup>CYT</sup>s (**Fig. 6E-6G**).  
505 Interestingly, besides the presence of microvilli, TS<sup>SYN</sup>s have a significant decrease in the  
506 transcriptome abundance of a large number of genes related to apical surface and apical  
507 junctions, including *ICAM1*, *TJPI*, *CDH1*, *CDH3*, that having described be important for  
508 pathogens invasion, sharing the same features as SYNs from PHTs cells (**Supplementary fig.**  
509 **2A**). So, we suggest that these features could be involved in the differential invasion/entry  
510 rates of *T. gondii* and *L. monocytogenes* in TS<sup>CYT</sup>s compared to TS<sup>SYN</sup>s. Surface proteoglycan  
511 content may also differ in TS<sup>SYN</sup> compared to TS<sup>CYT</sup>, a possible mechanism supported by  
512 both RNAseq data in the present study and others (Okoe *et al.*, 2018) that TS<sup>SYN</sup> have lower  
513 transcript abundance for HSPG2, and ICAM-1 compared to TS<sup>CYT</sup> (**Table S1**). HSPG2 and  
514 ICAM-1 are involved in *T. gondii* attachment and invasion, being targeted by parasite surface  
515 proteins such and SAG-3 and MIC-2, respectively to promote invasion (44, 45). Host cell  
516 surface proteoglycans are also generally critical for *T. gondii* adhesion (46), and our  
517 transcriptional data also show a clear reduction in the levels of XYLT1 transcript during the  
518 TS<sup>CYT</sup> to TS<sup>SYN</sup> conversion *in vitro* (**Table S1**), which catalyzes one of the first steps in  
519 proteoglycan synthesis by adding xylose to serine residues in target proteins (47). This is  
520 another possible means of restricting pathogen adhesion to SYNs, in particular for those that  
521 require preliminary adhesion events to proteoglycans. Lectin-based studies have also  
522 demonstrated clear differences in surface sugar content across different placental cell types  
523 including CYTs and SYNs (48). The TS<sup>SYN</sup> and TS<sup>CYT</sup> system could be used to study the role  
524 of surface proteoglycan content on cell-specific restriction in *T. gondii*/*L. monocytogenes*  
525 adhesion given its reproducible growth and differentiation characteristics and genetic  
526 tractability.

527 In addition to its physical barrier function, the trophoblast triggers a powerful immune  
528 response by releasing various cytokines and immunological factors. Trophoblasts produce  
529 cytokines constitutively and in response to infection, including those associated with the  
530 inflammasome, such as IL-1 $\beta$  and IL-18, which control *L. monocytogenes* infection (23). In  
531 contrast, CCL22 is only detected in large quantities following infection of PHT cells with *T.*  
532 *gondii* (18, 28). CCL22 also increases in abundance during miscarriage (49, 50). Our data  
533 showed that both TS<sup>CYT</sup>s and TS<sup>SYN</sup>s do not recapitulate the immunological secretome  
534 previously observed in PHT cells and villous explants, and in the present study placental  
535 organoids (**Fig. 7D**). Therefore, with respect to *T. gondii*, at least, TS<sup>SYN</sup>s can be used to  
536 directly explore the structural impediments to parasite adhesion and mechanisms of IFN $\gamma$ -

537 independent restriction of parasite replication, while other models like the placental organoid  
538 are more useful for studying both basal and induced immunological mechanisms of  
539 resistance.

540 The TS model permits us to circumvent one limitation of the PHT model which is that  
541 the cultures are a mixture of both CYT and SYN cells that vary in their ratios between  
542 preparations. Given that TS-derived CYTs and SYNs can be cultivated in a manner that leads  
543 to relatively pure cultures of a given cell type, we could examine putative CYT- and SYN-  
544 specific responses in isolation. We observed large differences in the transcriptional responses  
545 of each cell type, but one of the more remarkable findings was that although *T. gondii*  
546 invaded and proliferated poorly in TS<sup>SYNs</sup>, we still observed considerable changes in the  
547 transcriptional profile of these cells that rivaled those found in the more readily infected  
548 TS<sup>CYT</sup>s. The changes that we observed in the TS<sup>SYN</sup> could be driven more by paracrine  
549 responses to the presence of *T. gondii* rather than infection, although this would have to be  
550 investigated directly. It is also possible that the TS<sup>SYN</sup> are particularly sensitive to alterations  
551 induced by even the small number of invaded parasites, and/or that resistance pathways that  
552 drive the clear phenotype of restricting *T. gondii* replication by the TS<sup>SYN</sup> are robustly  
553 activated by *T. gondii*.

554 Human trophoblast stem cells have emerged in recent years as an important tool in  
555 studying placental development as well as pathogen resistance and responses. Here we show  
556 that these cells recapitulate primary human trophoblast and explant resistance phenotype  
557 profiles, with TS-derived SYNs being highly resistant to *T. gondii* infection and being ultra  
558 structurally similar to primary cells. TS-derived SYNs also resisted infection with *L.*  
559 *monocytogenes* (a feature shared with placental explants(22, 23), suggesting that resisting  
560 pathogen adhesion/attachment may be a generalized mechanism of SYN-resistance.  
561 However, the TS model has some limitations, most notably in its poor recapitulation of both  
562 constitutive and pathogen-induced cytokine production which is observed in primary  
563 trophoblast cultures and placental explants (18). These cells are genetically tractable tools to  
564 investigate cell-intrinsic mechanisms of resistance to pathogen adhesion and replication.

565

## 566 **AUTHOR CONTRIBUTION**

567 RJS participated in design and performed experiments, analyzed the data, and wrote  
568 the manuscript. LFC helped in acquisition of data and analyzed the data, JLG helped in the  
569 acquisition of data, LAC helped supervised the experiments. HY helped in the acquisition of

570 data. CBC helped in the acquisition of data. JPB, the principal investigator, participated in  
571 experimental design, supervised the experiments, and reviewed the manuscript.

572

### 573 **ACKNOLEGMENTS**

574 We thank D. Stolz, M. Sullivan, J. Franks, and Ming Sun (CBI-University of Pittsburgh) for  
575 processing the samples and for technical assistance with TEM and SEM.

576

### 577 **CONFLICT OF INTERST**

578 The authors declare that they have no conflict of interest.

### 579 **FUNDING**

580 This work was supported by National Institutes of Health grant R21AI139576 to JPB,  
581 and R01HD106247 to JPB and CBC. Brazilian Funding Agencies: Coordenação de  
582 Aperfeiçoamento de Pessoal de Nível Superior (CAPES).

### 583 **REFERENCES**

- 584 1. Kumar M, Saadaoui M, Al Khodor S. 2022. Infections and pregnancy: effects on  
585 maternal and child health. *Front Cell Infect Microbiol* 12:1–15.
- 586 2. Megli CJ, Coyne CB. 2022. Infections at the maternal–fetal interface: an overview of  
587 pathogenesis and defence. *Nat Rev Microbiol* 20:67–82.
- 588 3. Peyron F, L’ollivier C, Mandelbrot L, Wallon M, Piarroux R, Kieffer F, Hadjadj E,  
589 Paris L, Garcia-Meric P. 2019. Maternal and congenital toxoplasmosis: diagnosis and  
590 treatment recommendations of a French multidisciplinary working group. *Pathogens*  
591 8:1–15.
- 592 4. Dubey JP, Murata FHA, Cerqueira-Cézar CK, Kwok OCH, Villena I. 2021.  
593 Congenital toxoplasmosis in humans: an update of worldwide rate of congenital  
594 infections. *Parasitology* 148:1406–1416.
- 595 5. El Bissati K, Levigne P, Lykins J, Adlaoui EB, Barkat A, Berraho A, Laboudi M, El  
596 Mansouri B, Ibrahimi A, Rhajaoui M, Quinn F, Murugesan M, Seghrouchni F, Gómez-  
597 Marín JE, Peyron F, McLeod R. 2018. Global initiative for congenital toxoplasmosis:  
598 an observational and international comparative clinical analysis. *Emerg Microbes*  
599 *Infect* 8:1406–1416
- 600 6. Piao LX, Cheng JH, Aosai F, Zhao XD, Norose K, Jin XJ. 2018. Cellular  
601 immunopathogenesis in primary *Toxoplasma gondii* infection during pregnancy.  
602 *Parasite Immunol* 40:0–2.
- 603 7. Kodjikian L. 2010. Toxoplasmose et grossesse. *J Fr Ophtalmol* 33:362–367.
- 604 8. Rostami A, Riahi SM, Contopoulos-Ioannidis DG, Gamble HR, Fakhri Y, Shiadeh  
605 MN, Foroutan M, Behniafar H, Taghipour A, Maldonado YA, Mokdad AH, Gasser

- 606 RB. 2019. Acute *Toxoplasma* infection in pregnant women worldwide: A systematic  
607 review and meta-analysis. PLoS Negl Trop Dis 13:1–20.
- 608 9. Li XL, Wei HX, Zhang H, Peng HJ, Lindsay DS. 2014. A meta analysis on risks of  
609 adverse pregnancy outcomes in *Toxoplasma gondii* infection. PLoS One 9:1–12.
- 610 10. Carlier Y, Truyens C, Deloron P, Peyron F. 2012. Congenital parasitic infections: A  
611 review. Acta Trop 121:55–70.
- 612 11. Bollani L, Auriti C, Achille C, Garofoli F, De Rose DU, Meroni V, Salvatori G,  
613 Tzialla C. 2022. Congenital toxoplasmosis: the state of the art. Front Pediatr 10:1–12.
- 614 12. Napso T, Yong HEJ, Lopez-Tello J, Sferruzzi-Perri AN. 2018. The role of placental  
615 hormones in mediating maternal adaptations to support pregnancy and lactation. Front  
616 Physiol 9:1–39.
- 617 13. Gude NM, Roberts CT, Kalionis B, King RG. 2004. Growth and function of the  
618 normal human placenta. Thromb Res 114:397–407.
- 619 14. Delorme-Axford E, Donker RB, Mouillet JF, Chu T, Bayer A, Ouyang Y, Wang T,  
620 Stolz DB, Sarkar SN, Morelli AE, Sadovsky Y, Coyne CB. 2013. Human placental  
621 trophoblasts confer viral resistance to recipient cells. Proc Natl Acad Sci U S A  
622 110:12048–12053.
- 623 15. Kaye A. 2011. Toxoplasmosis: diagnosis, treatment, and prevention in congenitally  
624 exposed infants. J Pediatr Health Care 25:355–364.
- 625 16. Arora N, Sadovsky Y, Dermody TS, Coyne CB. 2017. Microbial vertical transmission  
626 during human pregnancy. Cell Host Microbe 21:561–567.
- 627 17. Cinkornpumin JK, Kwon SY, Guo Y, Hossain I, Sirois J, Russett CS, Tseng HW,  
628 Okae H, Arima T, Duchaine TF, Liu W, Pastor WA. 2020. Naive human embryonic  
629 stem cells can give rise to cells with a trophoblast-like transcriptome and methylome.  
630 Stem Cell Reports 15:198–213.
- 631 18. Ander SE, Rudzki EN, Arora N, Sadovsky Y, Coyne CB, Boyle JP. 2018. Human  
632 placental syncytiotrophoblasts restrict *Toxoplasma gondii* attachment and replication  
633 and respond to infection by producing immunomodulatory chemokines. mBio 9:1–14.
- 634 19. Varberg KM, Iqbal K, Muto M, Simon ME, Scott RL, Kozai K, Choudhury RH, Aplin  
635 JD, Biswell R, Gibson M, Okae H, Arima T, Vivian JL, Grundberg E, Soares MJ.  
636 2021. ASCL2 reciprocally controls key trophoblast lineage decisions during  
637 hemochorial placenta development. Proc Natl Acad Sci U S A 118:1–11.
- 638 20. Robbins JR, Zeldovich VB, Poukchanski A, Boothroyd JC, Bakardjiev AI. 2012.  
639 Tissue barriers of the human placenta to infection with *Toxoplasma gondii*. Infect  
640 Immun 80:418–28.
- 641 21. Bayer A, Lennemann NJ, Ouyang Y, Bramley JC, Morosky S, Marques ETDA, Cherry  
642 S, Sadovsky Y, Coyne CB. 2016. Type III interferons produced by human placental  
643 trophoblasts confer protection against Zika Virus Infection. Cell Host Microbe  
644 19:705–712.

- 645 22. Robbins JR, Skrzypczynska KM, Zeldovich VB, Kapidzic M, Bakardjiev AI. 2010.  
646 Placental syncytiotrophoblast constitutes a major barrier to vertical transmission of  
647 *Listeria monocytogenes*. PLoS Pathog 6.
- 648 23. Megli C, Morosky S, Rajasundaram D, Coyne CB. 2021. Inflammasome signaling in  
649 human placental trophoblasts regulates immune defense against *Listeria*  
650 *monocytogenes* infection. Journal of Experimental Medicine 218.
- 651 24. Robbins JR, Zeldovich VB, Poukchanski A, Boothroyd JC, Bakardjiev AI. 2012.  
652 Tissue barriers of the human placenta to infection with *Toxoplasma gondii*. Infect  
653 Immun 80:418–428.
- 654 25. McConkey CA, Delorme-Axford E, Nickerson CA, Kim KS, Sadovsky Y, Boyle JP,  
655 Coyne CB. 2016. A three-dimensional culture system recapitulates placental  
656 syncytiotrophoblast development and microbial resistance. Sci Adv 2:1–10.
- 657 26. Ander SE, Diamond MS, Coyne CB. 2019. Immune responses at the maternal-fetal  
658 interface. Sci Immunol 4:eaat6114.
- 659 27. Okae H, Toh H, Sato T, Hiura H, Takahashi S, Shirane K, Kabayama Y, Suyama M,  
660 Sasaki H, Arima T. 2018. Derivation of human trophoblast stem cells. Cell Stem Cell  
661 22:50-63.e6.
- 662 28. Rudzki EN, Ander SE, Coombs RS, Alrubaye HS, Cabo LF, Blank ML, Gutiérrez-  
663 Melo N, Dubey JP, Coyne CB, Boyle JP. 2021. *Toxoplasma gondii* GRA28 is required  
664 for placenta-specific induction of the regulatory chemokine CCL22 in human and  
665 mouse. mBio 12:e0159121.
- 666 29. Alonzo F, Port GC, Cao M, Freitag NE. 2009. The posttranslocation chaperone PrsA2  
667 contributes to multiple facets of *Listeria monocytogenes* pathogenesis. Infect Immun  
668 77:2612–2623.
- 669 30. Alonzo F, McMullen PD, Freitag NE. 2011. Actin polymerization drives septation of  
670 *Listeria monocytogenes* *namA* hydrolase mutants, demonstrating host correction of a  
671 bacterial defect. Infect Immun 79:1458–1470.
- 672 31. Varet H, Brillet-Guéguen L, Coppée JY, Dillies MA. 2016. SARTools: A DESeq2-  
673 and edgeR-based R pipeline for comprehensive differential analysis of RNA-Seq data.  
674 PLoS One 11:1–8.
- 675 32. Yang L, Semmes EC, Ovies C, Megli C, Permar S, Gilner JB, Coyne CB. 2022. Innate  
676 immune signaling in trophoblast and decidua organoids defines differential antiviral  
677 defenses at the maternal-fetal interface. Elife 11:79794.
- 678 33. De Los Rios Castillo D, Zarco-Zavala M, Olvera-Sanchez S, Pardo JP, Juarez O,  
679 Martinez F, Mendoza-Hernandez G, García-Trejo JJ, Flores-Herrera O. 2011. Atypical  
680 cristae morphology of human syncytiotrophoblast mitochondria. J Biol Chemi  
681 286:23911–23919.
- 682 34. Li L, Schust DJ. 2015. Isolation, purification and in vitro differentiation of  
683 cytotrophoblast cells from human term placenta. Reprod Biol Endocrinol 13:1–9.



- 684 35. English ED, Boyle JP. 2015. Secreted effectors in *Toxoplasma gondii* and related  
685 species: determinants of host range and pathogenesis? *Parasite Immunol* 37:127–140.
- 686 36. Hakimi M, Olias P, David L. 2017. *Toxoplasma* effectors targeting host signaling and  
687 transcription. *Clin Microbiol Rev* 30:615–645.
- 688 37. Alonzo F, Freitag NE. 2010. *Listeria monocytogenes* PrsA2 is required for virulence  
689 factor secretion and bacterial viability within the host cell cytosol. *Infect Immun*  
690 78:4944–4957.
- 691 38. Cahoon LA, Alejandro-Navarro X, Gururaja AN, Light SH, Alonzo F, Anderson  
692 WF, Freitag NE. 2022. *Listeria monocytogenes* two component system PieRS  
693 regulates secretion chaperones PrsA1 and PrsA2 and enhances bacterial translocation  
694 across the intestine. *Mol Microbiol* 118:278–293.
- 695 39. Portnoy DA, Jacks PS, Hinrichs DJ. 1988. Role of hemolysin for the intracellular  
696 growth of *Listeria monocytogenes*. *J Exp Med* 167:1459–1471.
- 697 40. Abbasi M, Kowalewska-Grochowska K, Bahar MA, Kilani RT, Winkler-Lowen B,  
698 Guilbert LJ. 2003. Infection of placental trophoblasts by *Toxoplasma gondii*. *J Infect*  
699 *Dis* 188:608–616.
- 700 41. Johnson LJ, Azari S, Webb A, Zhang X, Gavrilin MA, Marshall JM, Rood K, Seveau  
701 S. 2021. Human placental trophoblasts infected by *Listeria monocytogenes* undergo a  
702 pro-inflammatory switch associated with poor pregnancy outcomes. *Front Immunol*  
703 12:709466.
- 704 42. Ockleford, C. D., Wakely, J. and Badley RA. 2012. Morphogenesis of human placental  
705 chorionic villi: cytoskeletal, syncytioskeletal and extracellular matrix proteins. *Proc R*  
706 *Soc Lond B Biol Sci* 212:305–316.
- 707 43. Robbins, J. R. and Bakardjiev AI. 2012. Pathogens and the placental fortress. *Curr*  
708 *Opin Microbiol* 15:36–43.
- 709 44. Jacquet A, Coulon L, De Nève J, Daminet V, Haumont M, Garcia L, Bollen A, Jurado  
710 M, Biemans R. 2001. The surface antigen SAG3 mediates the attachment of  
711 *Toxoplasma gondii* to cell-surface proteoglycans. *Mol Biochem Parasitol* 116:35–44.
- 712 45. Barragan T, Brossier F, Sibley LD, Barragan A, Brossier F, David Sibley L. 2005.  
713 Transepithelial migration of *Toxoplasma gondii* involves an interaction of intercellular  
714 adhesion molecule 1 (ICAM-1) with the parasite adhesin MIC2. *Cell Microbiol* 7:561–  
715 568.
- 716 46. Carruthers VB, Håkansson S, Giddings OK, David Sibley L. 2000. *Toxoplasma gondii*  
717 uses sulfated proteoglycans for substrate and host cell attachment. *Infect Immun*  
718 68:4005–4011.
- 719 47. Kearns AE, Vertel BM, Schwartz NB. 1993. Topography of glycosylation and UDP-  
720 xylose production. *Journal of Biological Chemistry* 268:11097–11104.

- 721 48. Tatsuzuki A, Ezaki T, Makino Y, Matsuda Y, Ohta H. 2009. Characterization of the  
722 sugar chain expression of normal term human placental villi using lectin  
723 histochemistry combined with immunohistochemistry. *Arch Histol Cytol* 72:35–49.
- 724 49. Holtan SG, Chen Y, Kaimal R, Creedon DJ, Enninga EAL, Nevala WK, Markovic SN.  
725 2015. Growth modeling of the maternal cytokine milieu throughout normal pregnancy:  
726 Macrophage-derived chemokine decreases as inflammation/counterregulation  
727 increases. *J Immunol Res* 2015: 1–11.
- 728 50. Freier CP, Kuhn C, Rapp M, Endres S, Mayr D, Friese K, Anz D, Jeschke U. 2015.  
729 Expression of CCL22 and infiltration by regulatory T cells are increased in the decidua  
730 of human miscarriage placentas. *Am J Reprod Immunol* 74:216–227.

731

## 732 **FIGURE LEGENDS**

733 **Figure 1: Trophoblast stem (TS) cells differentiated into syncytiotrophoblast-like cells**  
734 **have innate resistance to *Toxoplasma gondii*.** TS<sup>CYT</sup>, TS<sup>SYN</sup> and mixed populations of  
735 TS<sup>SYNs</sup> and TS<sup>CYT</sup>s were cultured from  $1.5 \times 10^5$  cells in a 6-well plate in triplicate. Cells were  
736 infected or not with *T. gondii* with MOI of 5 for 24h prior to immunofluorescence, qPCR or  
737 RNA-seq analysis. Immunofluorescence was performed to stain cells with TS<sup>SYN</sup> marker  
738 (SDC-1) (pink), TS<sup>CYT</sup> marker (ITGA-6) (red), DAPI (blue) and *T. gondii* (green). (A)  
739 Quantification of SDC-1 in TS<sup>CYT</sup>, TS<sup>SYN</sup> and mixed populations of TS<sup>SYNs</sup> and TS<sup>CYT</sup>s were  
740 calculated by the percentage (%) of fluorescence expression of SDC-1 normalized by total  
741 cell area. Differences between cells were analyzed by one-way ANOVA with Bonferroni  
742 multiple comparison *post-hoc* test. \*\*\*\* $P < 0.0001$ . (B) Representative images showing  
743 immunofluorescence microscopy of TS<sup>CYT</sup>, mixed populations of TS<sup>SYN</sup> and TS<sup>CYT</sup>, and 3D  
744 TS<sup>SYN</sup> (which exclusively form SYNs). Images such as these were used to generate the data  
745 in panel A. (C) Heat map showing transcript abundance in TS<sup>CYT</sup> and TS<sup>SYN</sup> for ITGA-6,  
746 CGB1, 2, 7, 3, 5, 8 and SDC-1 in mock treated and infected cells (*P*<sub>adj</sub> 0.01; log fold change  
747  $\geq 2$  or  $\leq -2$  for all genes shown). This data provide transcriptional evidence for the  
748 establishment of TS<sup>CYT</sup> and TS<sup>SYN</sup> cultures in our laboratory, consistent with prior work  
749 (Okae *et al.*, 2018). (D) TEM photos showing the ultrastructure TS<sup>CYT</sup>s, highlighting the  
750 presence of lipid droplets (LD), glycogen granules (G), microvilli (MV) and mitochondria  
751 (M) and in TS<sup>SYNs</sup> we observe of presence of lots of mitophagy vesicles, nuclei (N),  
752 mitochondria (MV) and a dense microvilli (MV). (E) SEM showing the difference in the  
753 density of microvilli in TS<sup>CYT</sup>s and TS<sup>SYNs</sup>. (F) Immunofluorescence images demonstrating  
754 differences in *T. gondii* (RH: YFP) (green) infection and proliferation between TS<sup>CYT</sup> and  
755 TS<sup>SYN</sup> in mixed population, TS<sup>CYT</sup> culture and TS<sup>SYN</sup> 3D condition. Green arrows indicate

756 parasites that are either inside or associated with the outside of host cells. (E) Quantifying *T.*  
757 *gondii* burden using qPCR for the GRA1 transcript utilizing the standard curve. Differences  
758 between TS<sup>CYT</sup> and TS<sup>SYN</sup> were analyzed by *t*-test, \**P* = 0.001. Scale bar: 100 μm.

759

760 **Figure 2. TS<sup>SYNs</sup> become resistant to *T. gondii* on day 4 of differentiation.** TS<sup>SYNs</sup>  
761 differentiated in a ratio of 1.5 x 10<sup>5</sup> in a 6-well plate in duplicate. Cells were infected with *T.*  
762 *gondii* every day from day 1 to day 6 and collected after 24h post-infection, fixed with 4%  
763 PFA and then visualized using immunofluorescence. (A) The total of parasite area was  
764 measured by Image J software in 10 fields of view. Differences between the days of  
765 differentiation and the total of parasite vacuole size was analyzed by one-way ANOVA with  
766 Bonferroni multiple comparison *post-hoc* test. (B) Immunofluorescence images illustrate the  
767 parasite growth in different days of differentiation from day 1 to day 6. SDC-1<sup>+</sup> (TS<sup>SYN</sup>) in  
768 pink, *T. gondii* in green and DAPI in blue. Green arrows indicate parasites inside the host  
769 cells. Scale bar: 50 μm.

770

771 **Figure 3. *T. gondii* growth is restricted in TS<sup>SYN</sup> compared to TS<sup>CYT</sup>.** TS<sup>CYT</sup> and TS<sup>SYN</sup>  
772 cells were cultured on round coverslips in 24-well plates and infected on days 3 and 5 post-  
773 plating, respectively, at an MOI of 1.5 for 24 and 48. Cells were fixed with 4% PFA and then  
774 visualized using immunofluorescence. (A) *T. gondii* burden in TS<sup>CYT</sup> and TS<sup>SYN</sup> was  
775 measured based on average vacuole size divided by total host cell area at each time point.  
776 Four images were taken from each slide using epifluorescence microscopy and analyzed  
777 using ImageJ software. (B) Immunofluorescence images illustrate the parasite growth in the  
778 distinct cell cultures at 24 and 48 post-infection. ITGA-6<sup>+</sup> cells (TS<sup>CYT</sup>) are shown in red,  
779 SDC-1<sup>+</sup> (TS<sup>SYN</sup>) in pink, *T. gondii* in green and DAPI in blue. Green arrows indicate parasites  
780 that are either inside or associated with the outside of host cells. Even after 48 h there were  
781 very few parasites associated with the TS<sup>SYNs</sup>. Differences between TS<sup>CYT</sup> and TS<sup>SYN</sup> at  
782 different time points were analyzed by one-way ANOVA with a Bonferroni multiple  
783 comparison *post-hoc* test. \**P* < 0.0001 when comparing TS<sup>SYN</sup> and TS<sup>CYT</sup> at each time point  
784 and when comparing across time points in TS<sup>CYT</sup>. Two experiments were performed with  
785 three replicates. Scale bar: 100 μm.

786

787 **Figure 4. Transmission electron microscopy shows that *T. gondii* growth is restricted in**  
788 **TS<sup>SYN</sup> compared to TS<sup>CYT</sup>.** The TS<sup>SYNs</sup> cells and TS<sup>CYT</sup>s were infected with *T. gondii* for 24  
789 h and processed for TEM. (A-B) shows the *T. gondii* vacuole with healthy parasites growing

790 in TS<sup>CYT</sup>s. (C-D) *T. gondii*-containing vacuoles within TS<sup>SYNs</sup> were typically smaller and  
791 often harbored parasites showing signs of low viability such as vacuolation and loss of arc-  
792 like shape. Mag: 8,000 X and 12,000 X, scale bar: 2  $\mu$ m or 1  $\mu$ m, respectively.

793

794 **Figure 5. TS<sup>SYN</sup> are less susceptible to *T. gondii* invasion compared to TS<sup>CYT</sup>.** TS<sup>CYT</sup> and  
795 TS<sup>SYN</sup> were cultured on glass slides in 24-well plates and infected on days 3 and 5 post-  
796 culture, respectively, with an MOI of 5 for 24h. Cells were fixed with 4% PFA and the  
797 immunofluorescence was performed. (A) Quantification of *T. gondii* invasion in TS<sup>CYT</sup> and  
798 TS<sup>SYN</sup> was calculated by the total number of vacuoles with greater than one parasite per total  
799 cell area per field of view. (Differences between TS<sup>CYT</sup> and TS<sup>SYN</sup> were calculated by Mann-  
800 Whitney, \* $P = 0.0004$ ). Two independent experiments with three replicates were performed.

801

802 **Figure 6. Scanning electron microscopy in TS<sup>CYT</sup>s and TS<sup>SYN</sup> infected with *T. gondii*.**

803 TS<sup>CYT</sup> and TS<sup>SYN</sup> were infected for 2h and samples were collected for SEM and pictures were  
804 taken using the SEM microscopy. (A-D) qualitative images showing the parasite invasion  
805 process in TS<sup>CYT</sup>s, where we can visualize a large number of parasites under the membrane,  
806 suggesting successful invasion process. (E-G) qualitative images show parasites associated  
807 with TS<sup>SYNs</sup>. *Toxoplasma gondii*= Tg. Black arrows indicate the parasite. Mag: 10,000 X,  
808 scale bar: 1 $\mu$ m.

809

810 **Figure 7. Cytokine quantification in supernatants from TS<sup>SYN</sup> and TS<sup>CYT</sup> and**

811 **trophoblast organoids mock infected or infected with *T. gondii*.** The supernatants of  
812 TS<sup>CYT</sup>, TS<sup>SYN</sup> and TOs of mock or infected with *T. gondii* were collected after 24 h post-  
813 infection and the Luminex assay was performed to visualize the immunomodulatory profile  
814 in both cells and the induction of CCL22 of TOs. The heatmap graphs show the difference in  
815 secretome levels of different cytokines, chemokines, and immune factors in (A) TS<sup>CYT</sup> mock  
816 or infected and (B) TS<sup>SYN</sup> mock or infected with *T. gondii*. Differences among the secretion  
817 of CCL22 (C) in both cell types mock and infected and in (D) TOs. We also highlight the  
818 differences in secretion levels of (E) osteopontin and (F) MIF in TS<sup>CYT</sup>s and TS<sup>SYNs</sup> mock  
819 and infected with *T. gondii*. The data was expressed in pg/mL. Differences between TS<sup>CYT</sup>  
820 and TS<sup>SYN</sup> at the cytokine level were analyzed by one-way ANOVA with a Bonferroni  
821 multiple comparison *post-hoc* test.

822

823 **Figure 8. TS<sup>SYN</sup> and TS<sup>CYT</sup> infected cells reveal distinct gene expression profiles.**

824 Cells cultured in 6-well plates, and mock treated or infected with *T. gondii* on days 3 and 6  
825 post plating, respectively, with an MOI of 5 for 24h. Cells were collected and processed for  
826 RNA-sequencing. (A) Principal components PC1 and PC2 of TS<sup>CYT</sup> infected or mock  
827 infected and TS<sup>SYN</sup> infected or mock infected differentiated samples along the cell type (PC1)  
828 or infection status (PC2) axes. (B-D) MA-plots of transcript abundance in TS<sup>CYT</sup> and TS<sup>SYN</sup>  
829 mock treated or infected with *T. gondii*. Blue dots represent genes of significantly different  
830 abundance based on the statistical comparison being performed: (B) TS<sup>SYN</sup> infected versus  
831 TS<sup>SYN</sup> mock; (C) TS<sup>CYT</sup> infected versus TS<sup>CYT</sup> mock; (D) TS<sup>SYN</sup> mock versus TS<sup>CYT</sup> mock.  
832 These plots illustrate that the most dramatic differences between the samples are driven by  
833 the cell type (TS<sup>CYT</sup> or TS<sup>SYN</sup>). (E) Heat map showing immunity-related transcripts that were  
834 either constitutively different between cell types independent of infection status or altered in  
835 abundance by infection. ( $P_{adj} < 0.05$ ; log fold change  $\geq 1$  or  $\leq -1$ ). We used normalized  
836 enrichment scores (NES) generated using Pre-ranked Gene Set Enrichment Analysis (GSEA)  
837 from rlog-normalized data to evaluate the differences in enriched pathways between TS<sup>SYN</sup>  
838 and TS<sup>CYT</sup>. (F) GSEA plot shows different gene set pathways related to metabolism in TS<sup>SYN</sup>  
839 mock vs TS<sup>CYT</sup> mock. For the graph, only significantly enriched pathways are shown (FDR q-  
840 value  $< 0.05$ ). One experiment with three replicates was performed.

841

842 **Figure 9: TS<sup>SYNs</sup> are resistant to *Listeria monocytogenes* compared to TS<sup>CYT</sup>s.** Cells were  
843 infected with wildtype (10403S) strain and isogenic  $\Delta$ prA2 (NF-L1651),  $\Delta$ hly (DP-L2161)  
844 of *L. monocytogenes* for 8 h. (A) Colony forming units (CFUs) detected on BHI agar plates  
845 after 8 hours of Lm infection in TS<sup>CYT</sup> and TS<sup>SYN</sup>. All data is log-transformed for  
846 visualization and analysis. For all, \* =  $p < 0.05$ , \*\* =  $p < 0.01$ , \*\*\* =  $p < 0.001$ , \*\*\*\* =  $p <$   
847  $0.0001$ , ns = not significant. Data are analyzed with a two-way ANOVA with Holm-Šidák  
848 multiple comparisons test. Lm strain, cell type, and interaction are all  $P < 0.0001$ . Only pre-  
849 planned comparisons were made to minimize Type I error and those are shown on the graph.  
850 (B) Representative confocal images of GFP-tagged Lm-infected TS<sup>CYT</sup> or TS<sup>SYN</sup> for 8 hours.  
851 ITGA6 (TS<sup>CYT</sup>), SDC1 (TS<sup>SYN</sup>), DAPI (nuclei) and GFP (Lm). Two experiments in three  
852 replicates were performed. (C) Heat map showing transcript abundance of uninfected TS<sup>CYT</sup>  
853 and TS<sup>SYN</sup> for genes involved in the inflammasome pathway to illustrate relatively lower  
854 expression of these transcripts compared ITGA6 and SDC1 as representative markers CYTs  
855 and SYNs. (D) Quantification of the abundance abundance of IL-1 $\beta$  transcript using qPCR  
856 normalizing to  $\beta$ -Actin as a control. Differences between TS<sup>CYT</sup> mock and TS<sup>CYT</sup> infected,  
857 and TS<sup>SYN</sup> mock and TS<sup>SYN</sup> infected were analyzed by *t*-test showing no significant induction

858 of either transcript in Lm-exposed TS<sup>SYNs</sup> or TS<sup>CYT</sup>s. Two experiments with three replicates  
859 were performed.

860

861 **Figure 10. Transmission electron microscopy in infected TS<sup>CYT</sup>s and TS<sup>SYNs</sup> with *L.***

862 ***monocytogenes*.** TS<sup>CYT</sup>s and TS<sup>SYNs</sup> were infected with *L. monocytogenes* (WT) for 8h and  
863 processed for TEM. (A and B) show the intracellular *L. monocytogenes* in TS<sup>CYT</sup>s. (C and D)  
864 show *L. monocytogenes* associated with the TS<sup>SYNs</sup> membrane. Lm: *Listeria monocytogenes*.  
865 Black arrows indicate the bacteria. Mag: 10,000 X, scale bar: 1  $\mu$ m.

866

867 **Supplementary figure S1. Transmission electron microscopy in TS<sup>CYT</sup>s and TS<sup>SYNs</sup>.**

868 TS<sup>CYT</sup> and TS<sup>SYN</sup> were processed for TEM to differences in cells organelles in both cells.  
869 Representative TEM images show the mitochondria in TS<sup>CYT</sup>s (A and B) and in TS<sup>SYNs</sup> (C  
870 and D). Mitochondria= M. Mag. 60,000 X, scale bar: 200nm.

871

872 **Supplementary figure S2. Apical surface and apical junction genes set.** Using the bulk

873 RNAseq data generated by TS<sup>CYT</sup>s and TS<sup>SYNs</sup> mock and infected with *T. gondii* we used the  
874 Pre-ranked Gene Set Enrichment Analysis (GSEA) from rlog-normalized data to evaluate the  
875 differences in enriched pathways between TS<sup>SYN</sup> and TS<sup>CYT</sup>. Among the gene sets that are  
876 significantly downregulated in TS<sup>SYNs</sup> (FDR q-value < 0.05), we evaluated the apical surface  
877 and apical junction genes. (A) Heat map showing the apical surface and apical junction gene  
878 sets that have significantly different transcript abundance between TS<sup>CYT</sup>s and TS<sup>SYNs</sup>.

879

880 **Supplementary video 1. 3D reconstruction of TS<sup>CYT</sup> infected with GFP-tagged *Lm*.**

881 TS<sup>CYT</sup>s were infected with GFP-tagged *Lm* for 8 hours and cells were analyzed by confocal  
882 microscopy. Images in z-stack were made to develop the 3D reconstruction. TS<sup>CYT</sup> marker  
883 (ITGA-6) (pink), DAPI (nuclei) and *Lm* GFP (green).

884

885 **Supplementary video 2. 3D reconstruction of TS<sup>SYN</sup> infected with GFP-tagged *Lm*.**

886 TS<sup>SYNs</sup> were infected with GFP-tagged *Lm* for 8 hours and cells were analyzed by confocal  
887 microscopy. Images in z-stack were made to develop the 3D reconstruction. TS<sup>SYN</sup> marker  
888 SDC1 (red), DAPI (nuclei) and *Lm* GFP (green).

889

890 **Supplementary table S1: Log<sub>2</sub> (FPKM) transcript count values from TS<sup>SYNs</sup> and TS<sup>CYT</sup>s**

891 mock and infected with *Toxoplasma gondii*.



**Figure 1**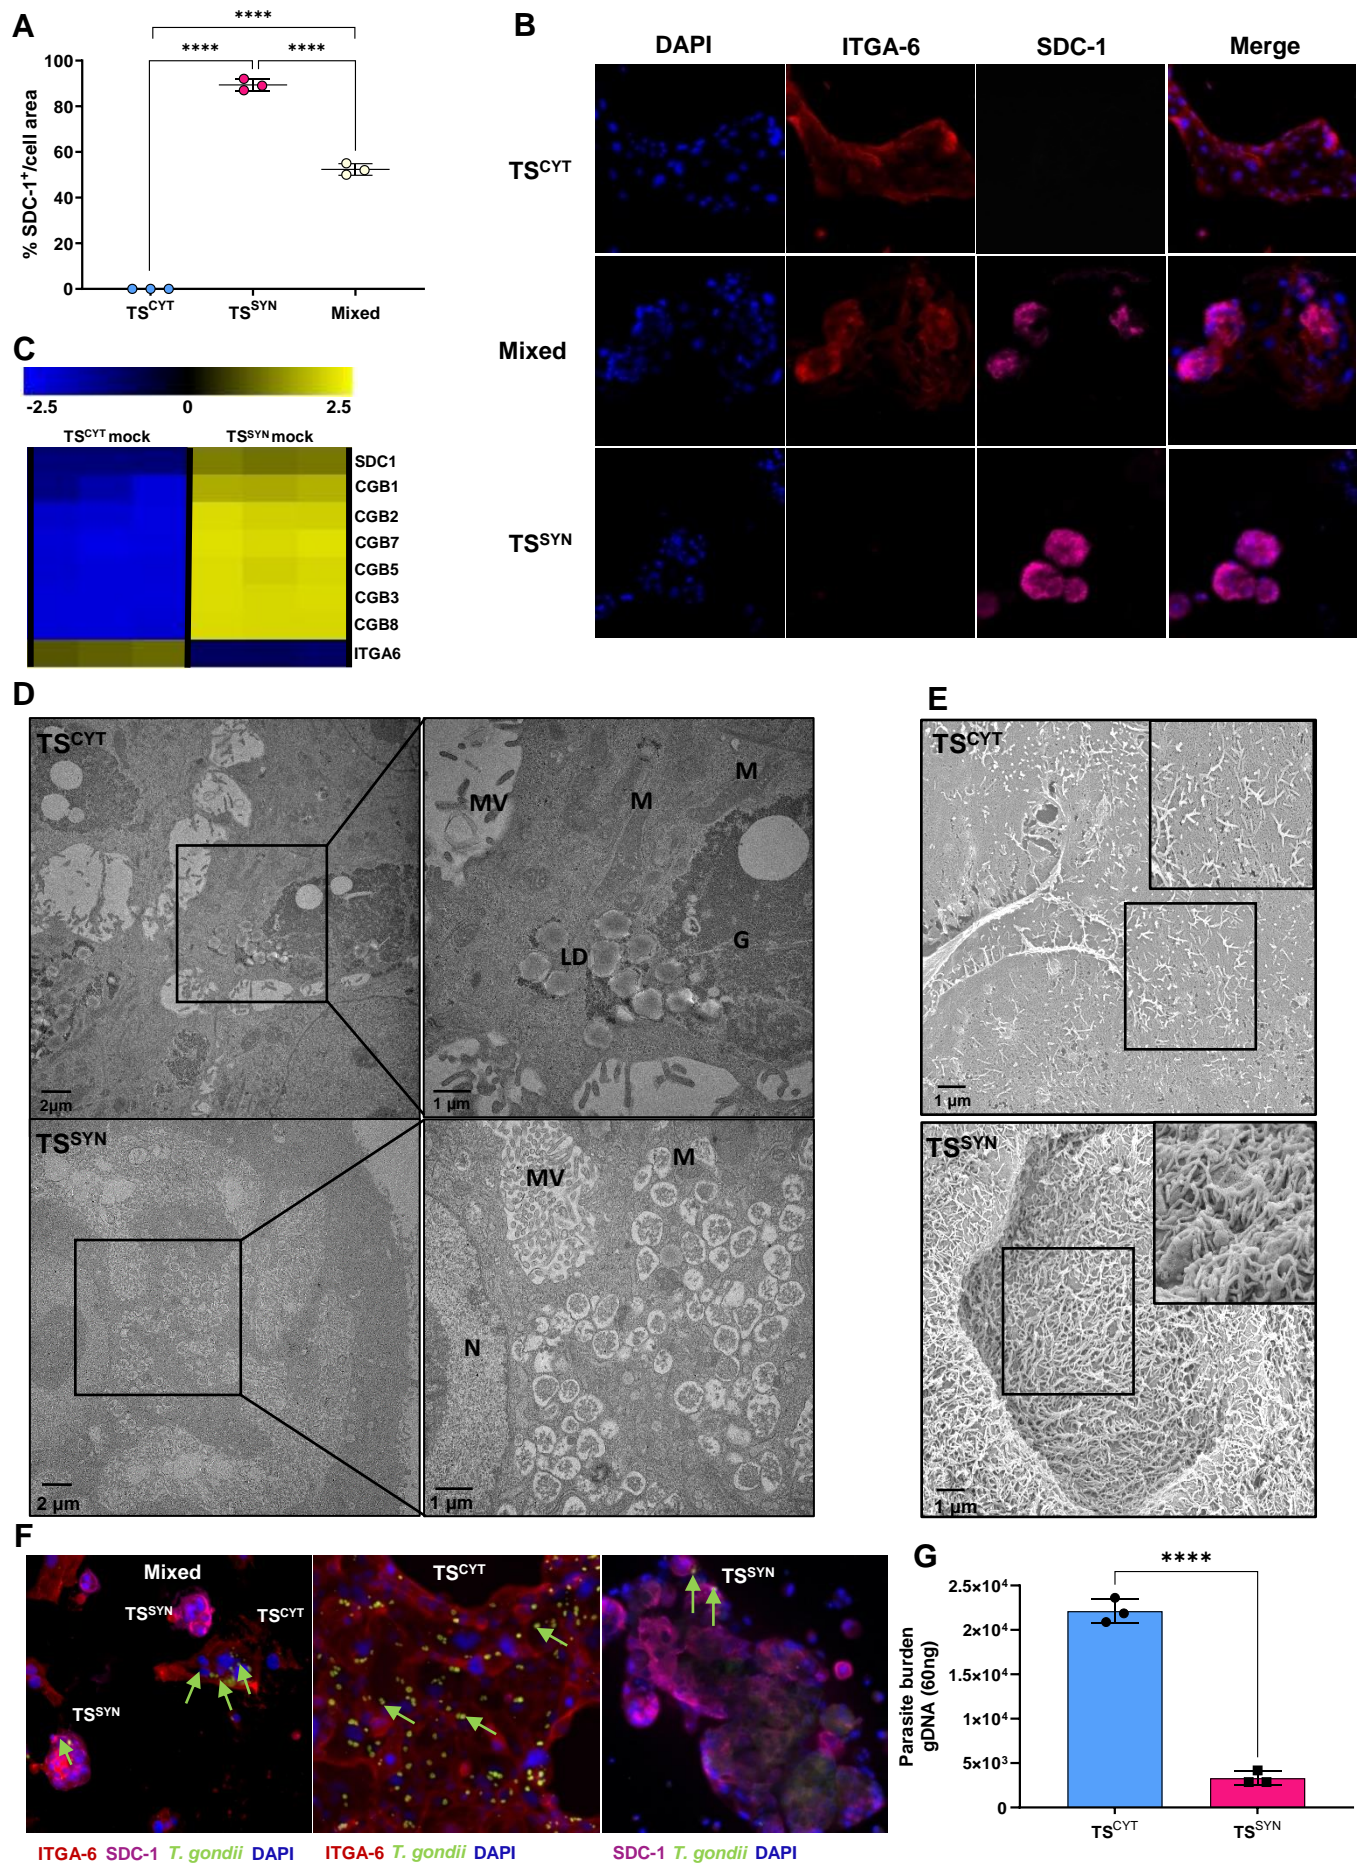

Figure 2

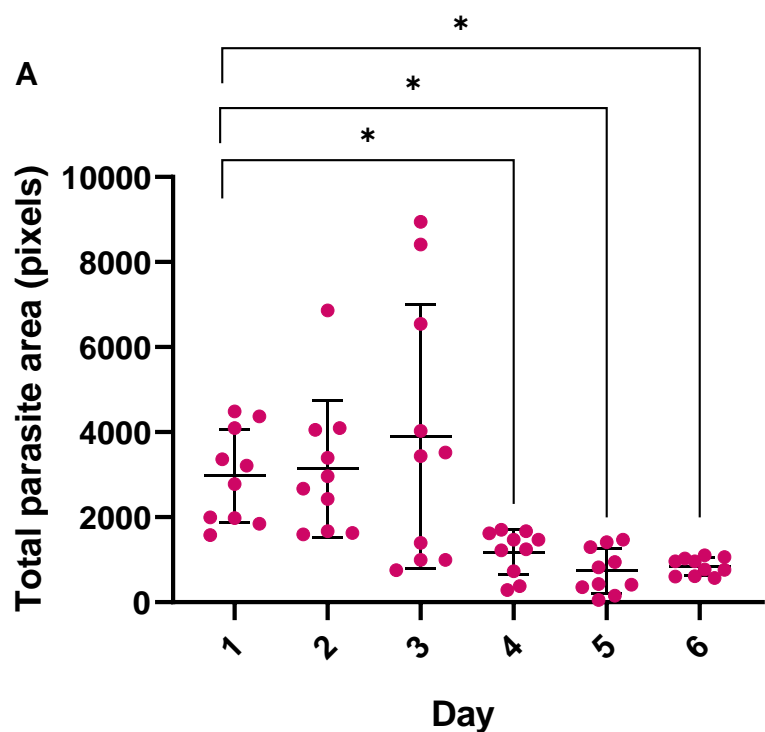

**B**

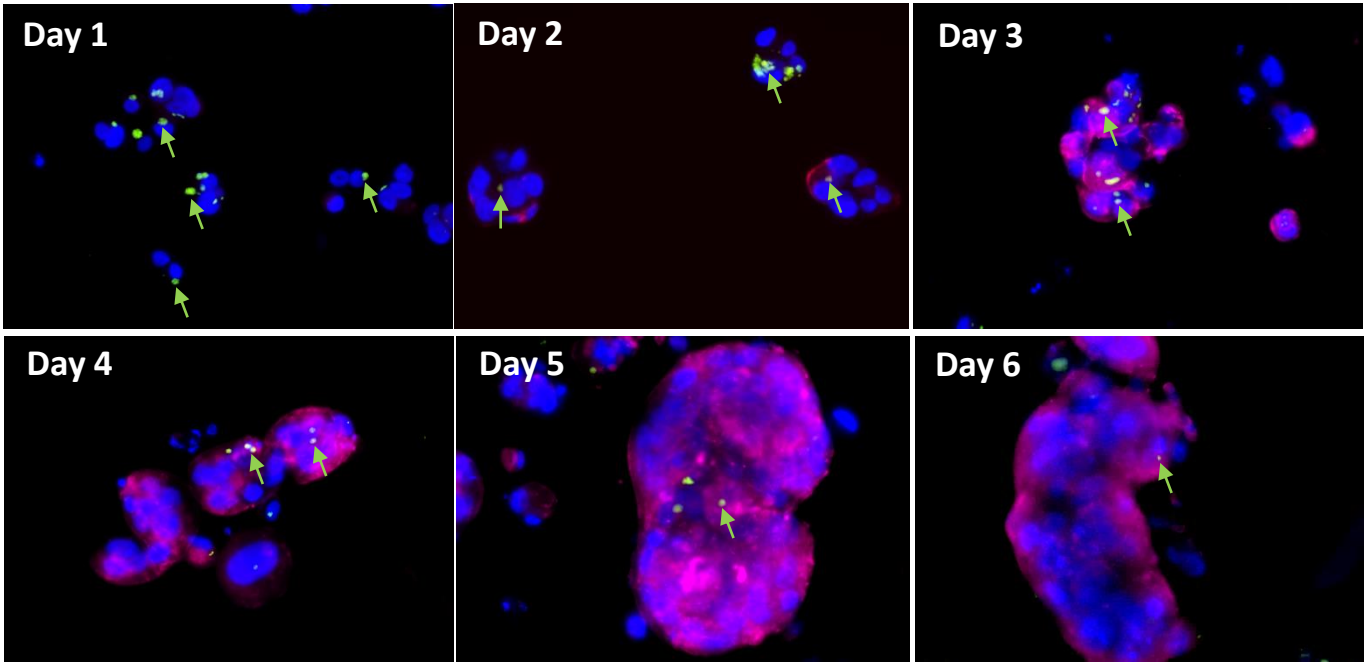

SDC-1 *T. gondii* DAPI

Figure 3

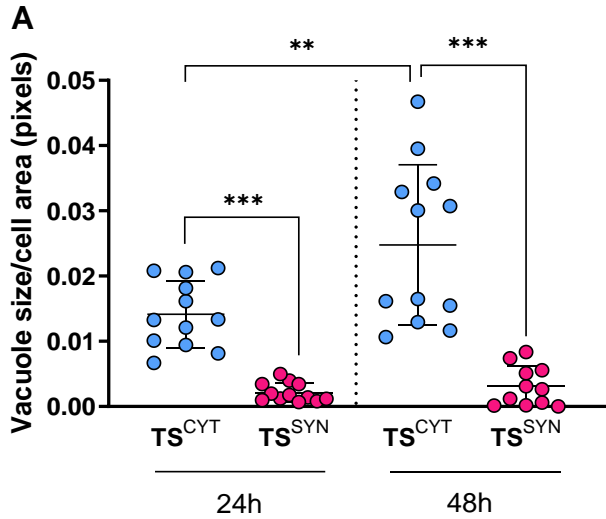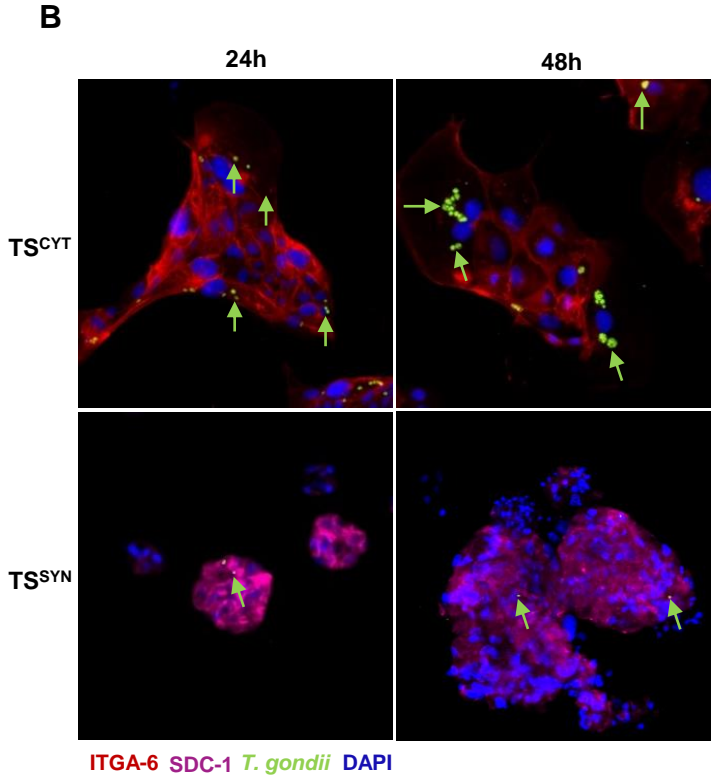



Figure 4

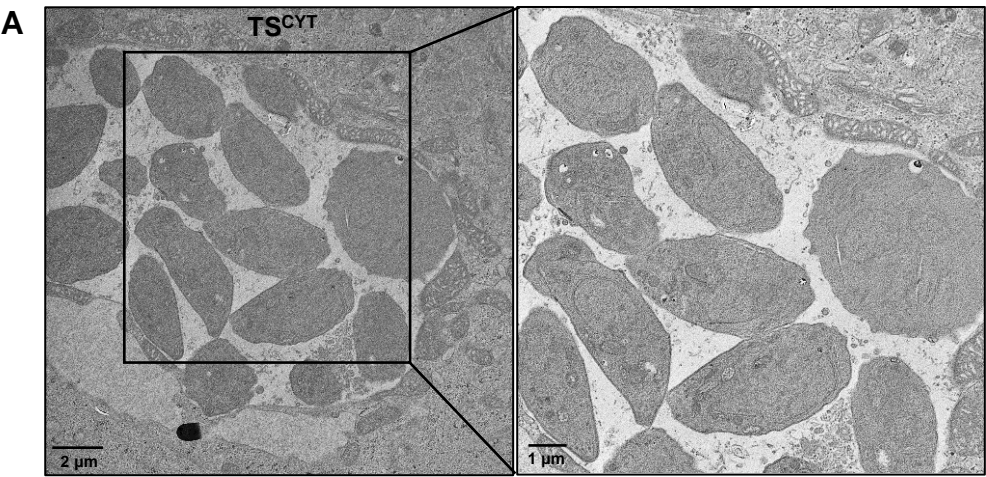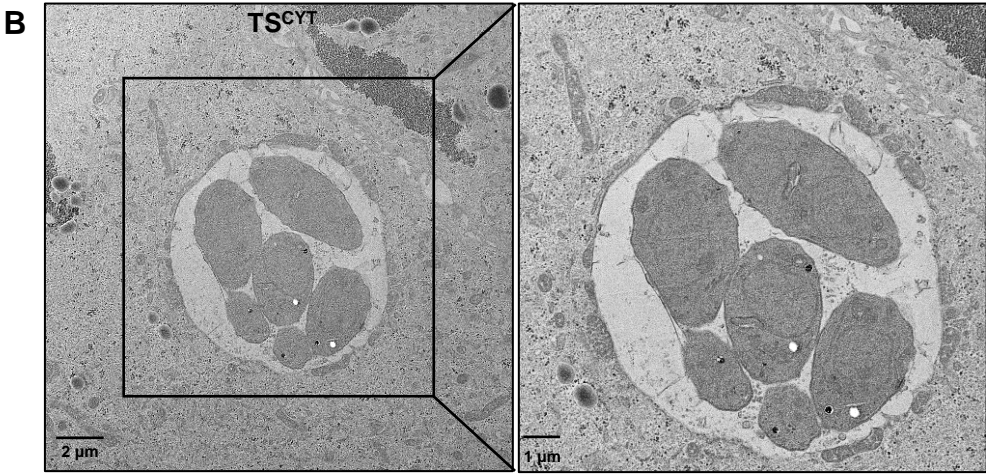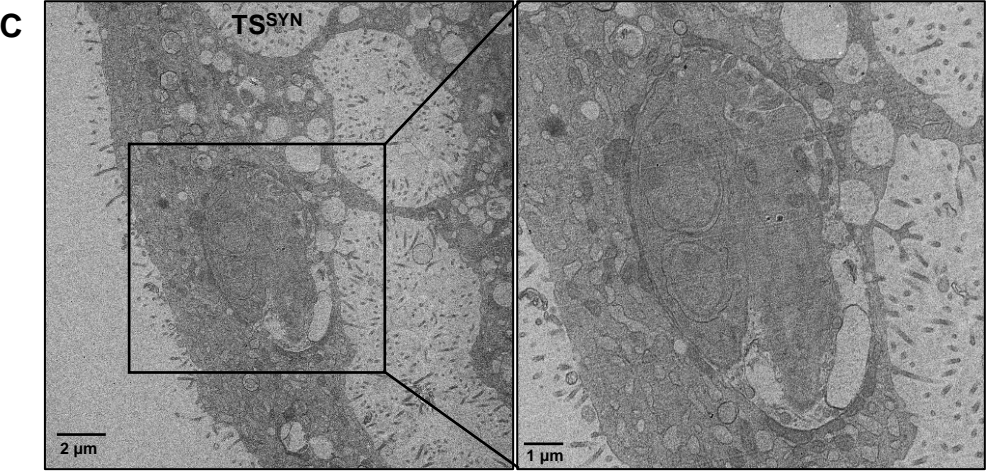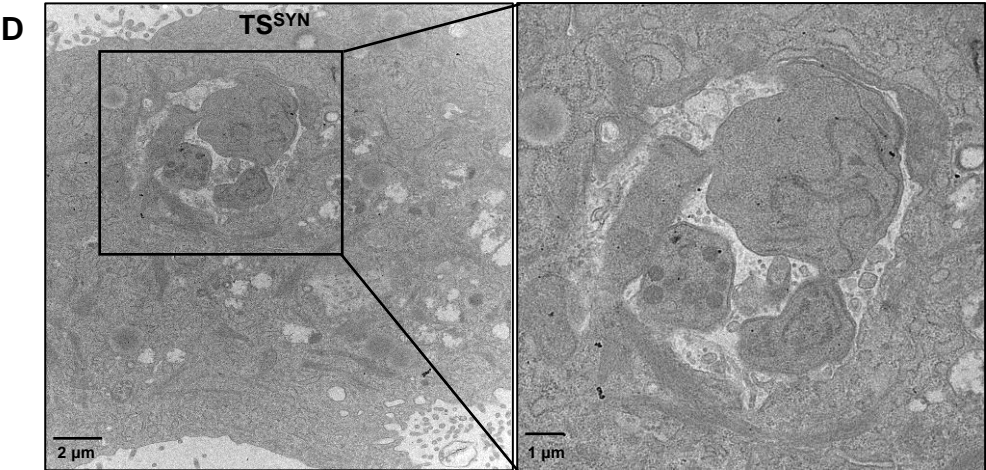

Figure 5

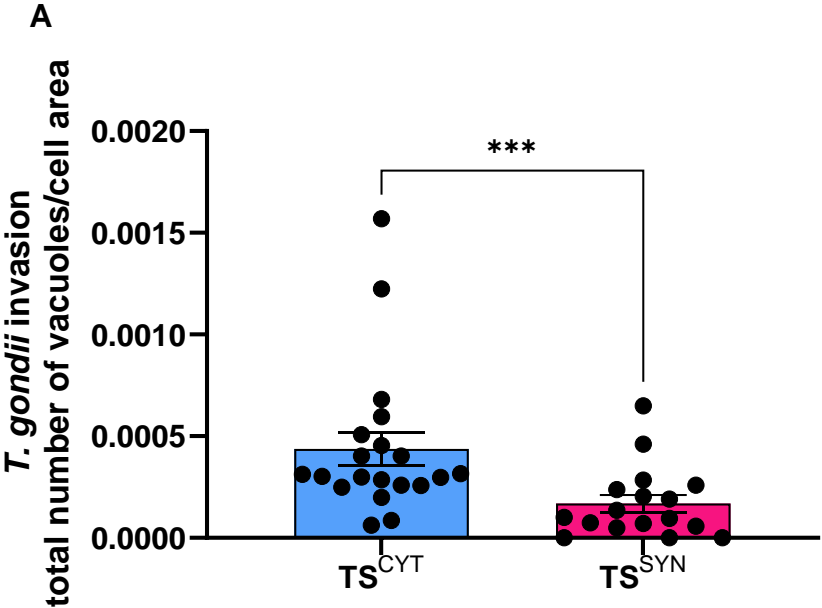



Figure 6

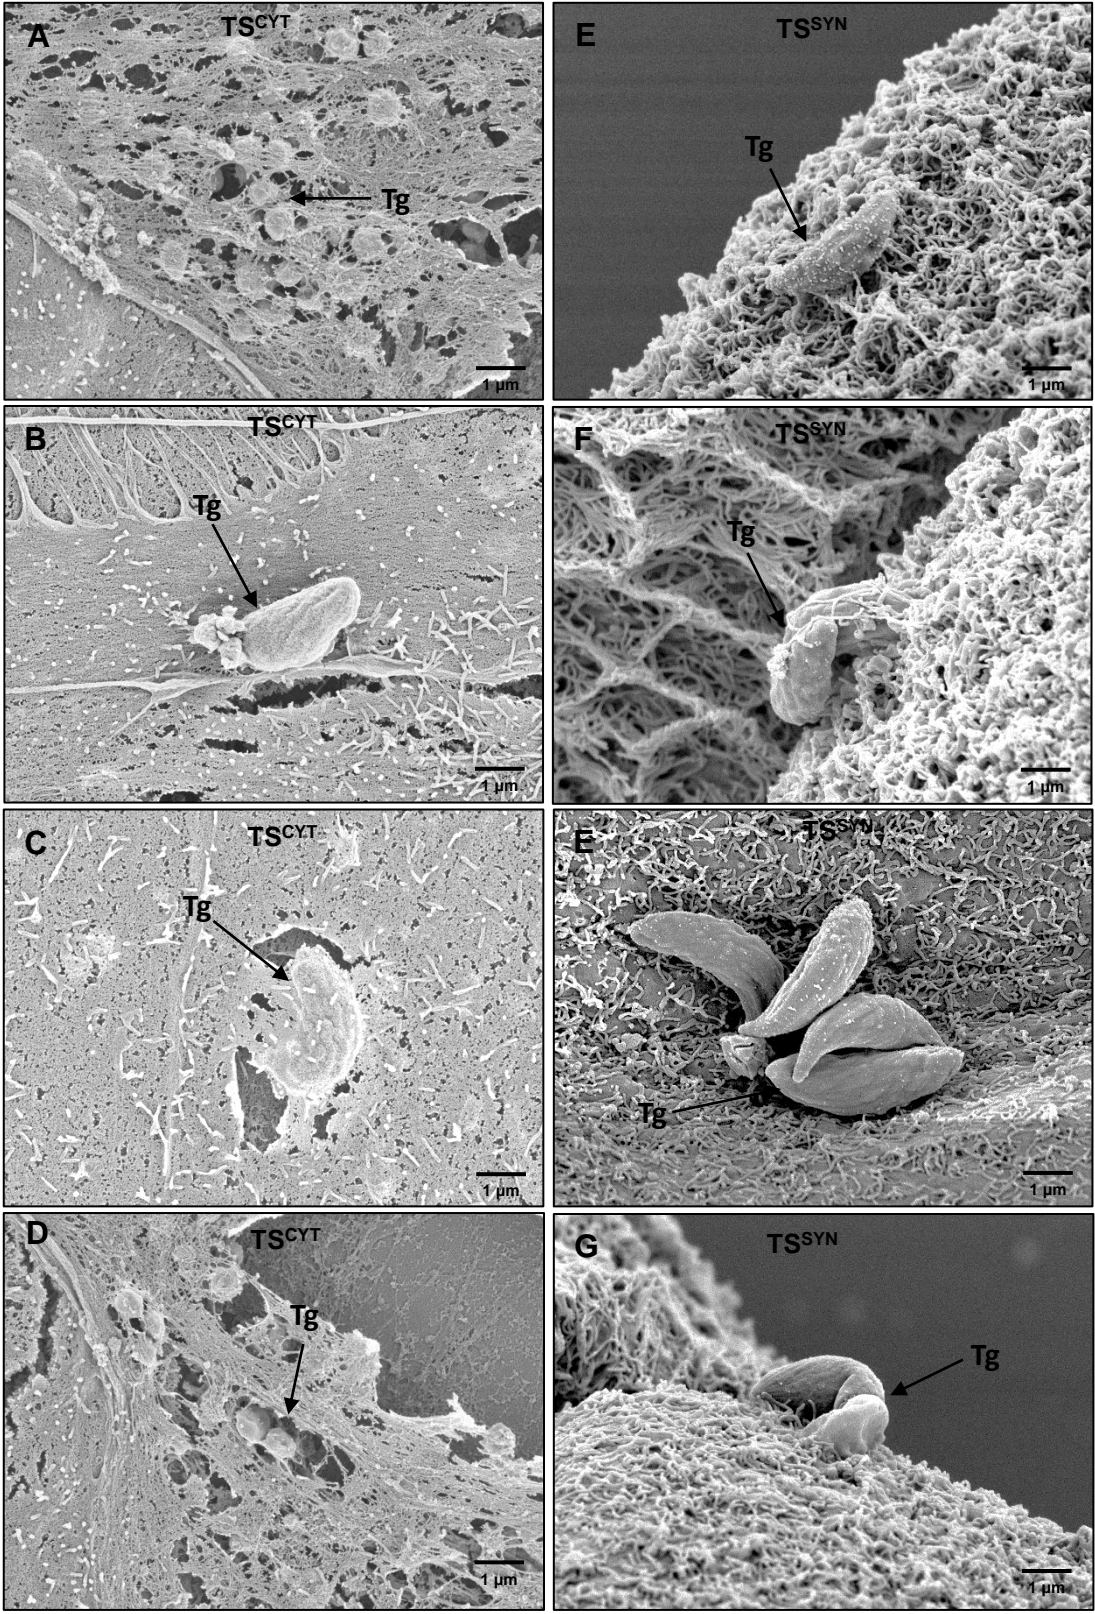



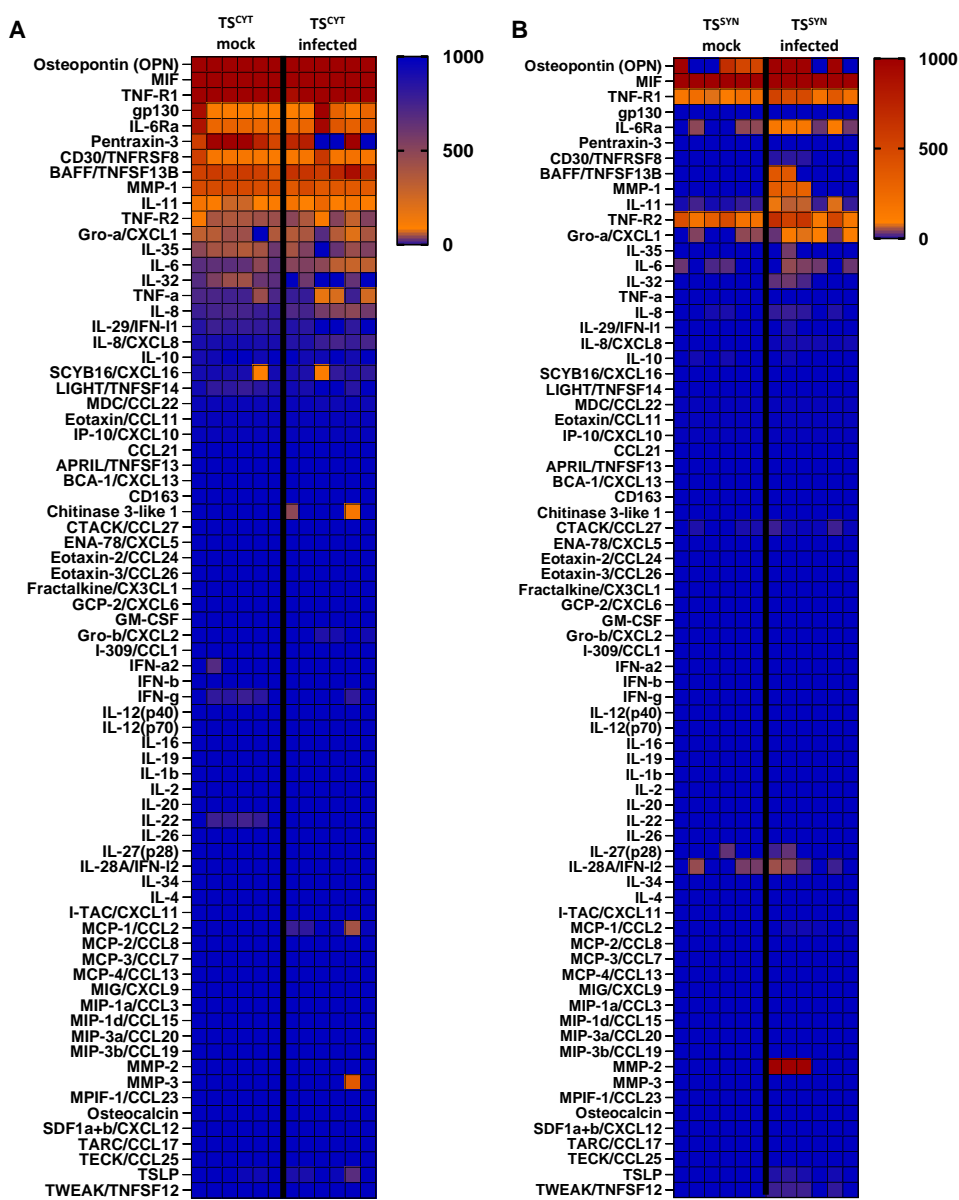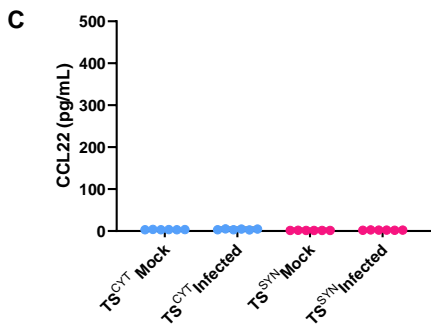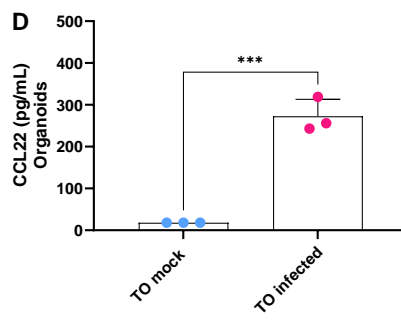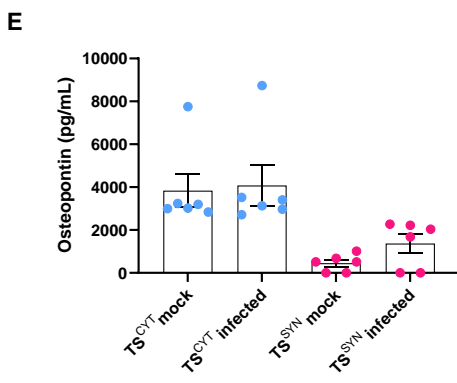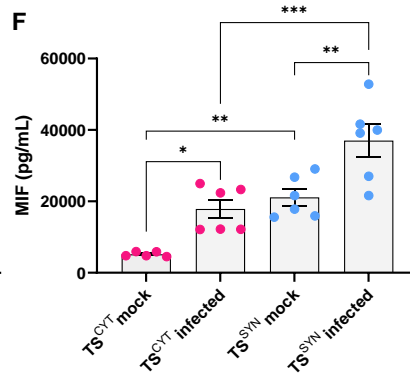

**Figure 8**

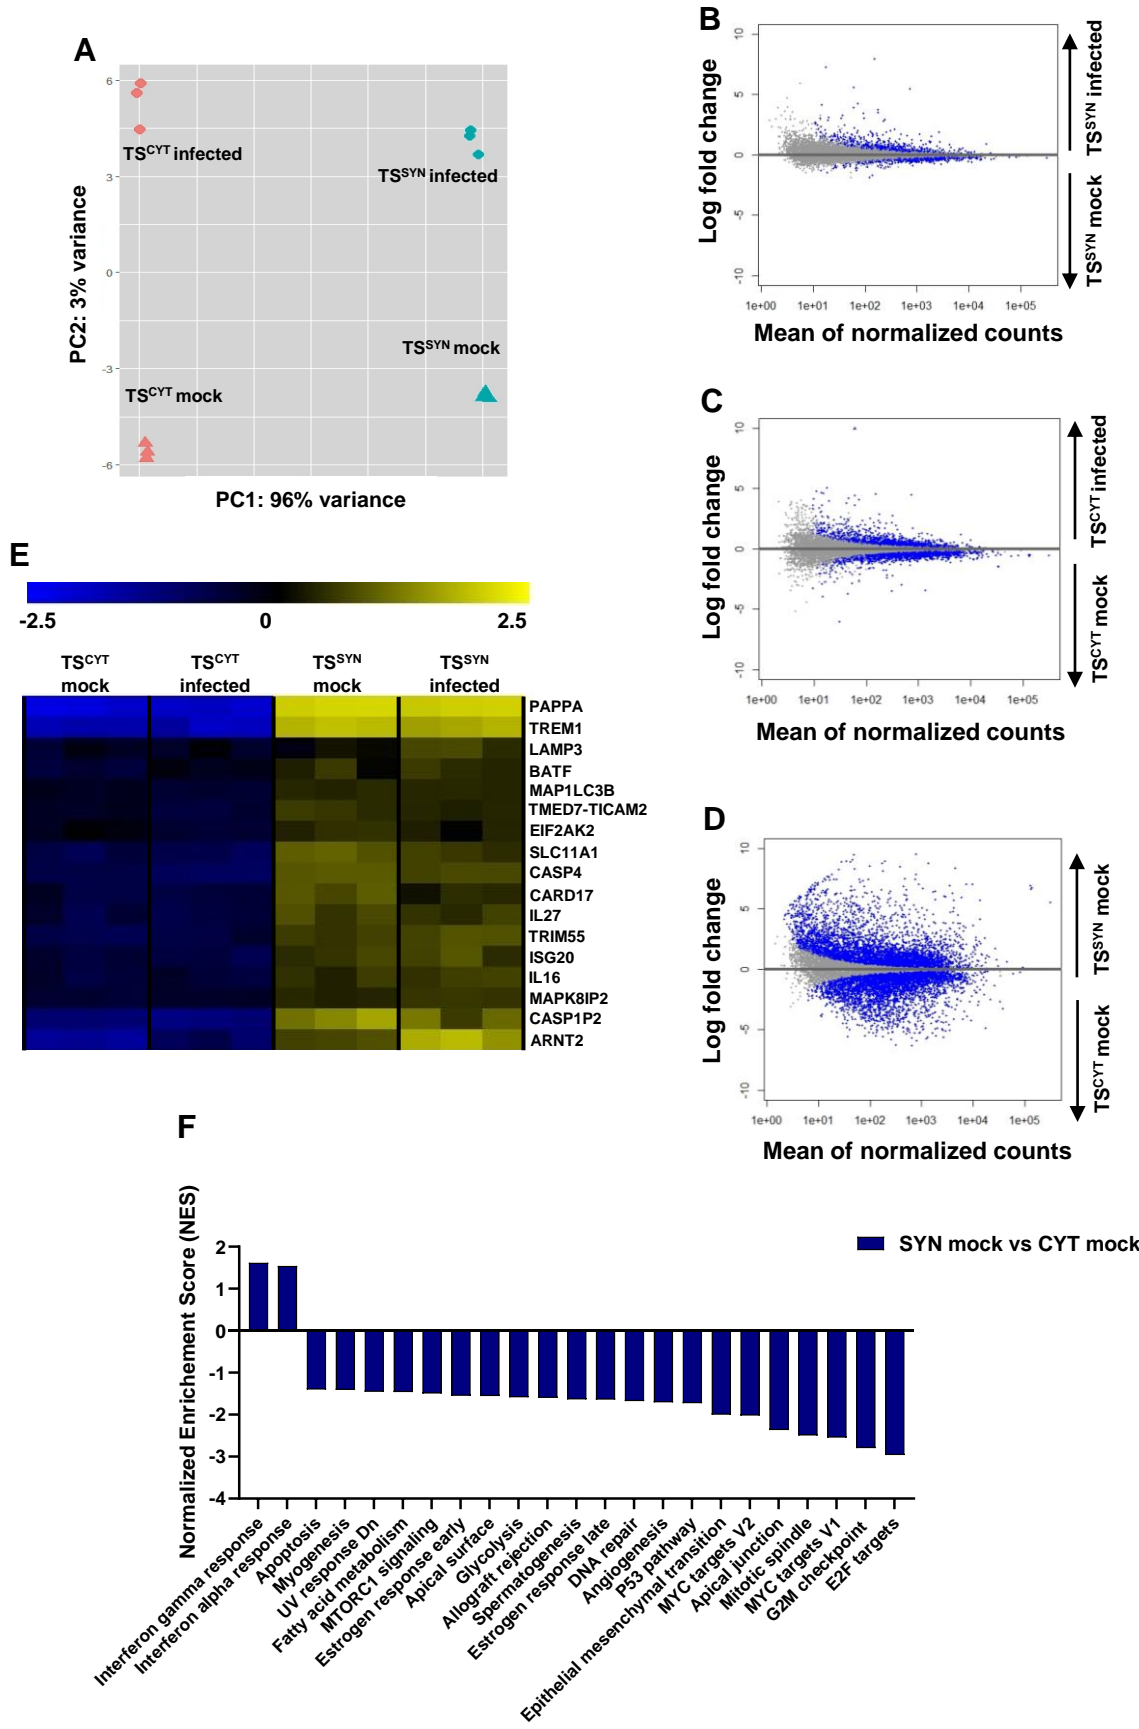

Figure 9

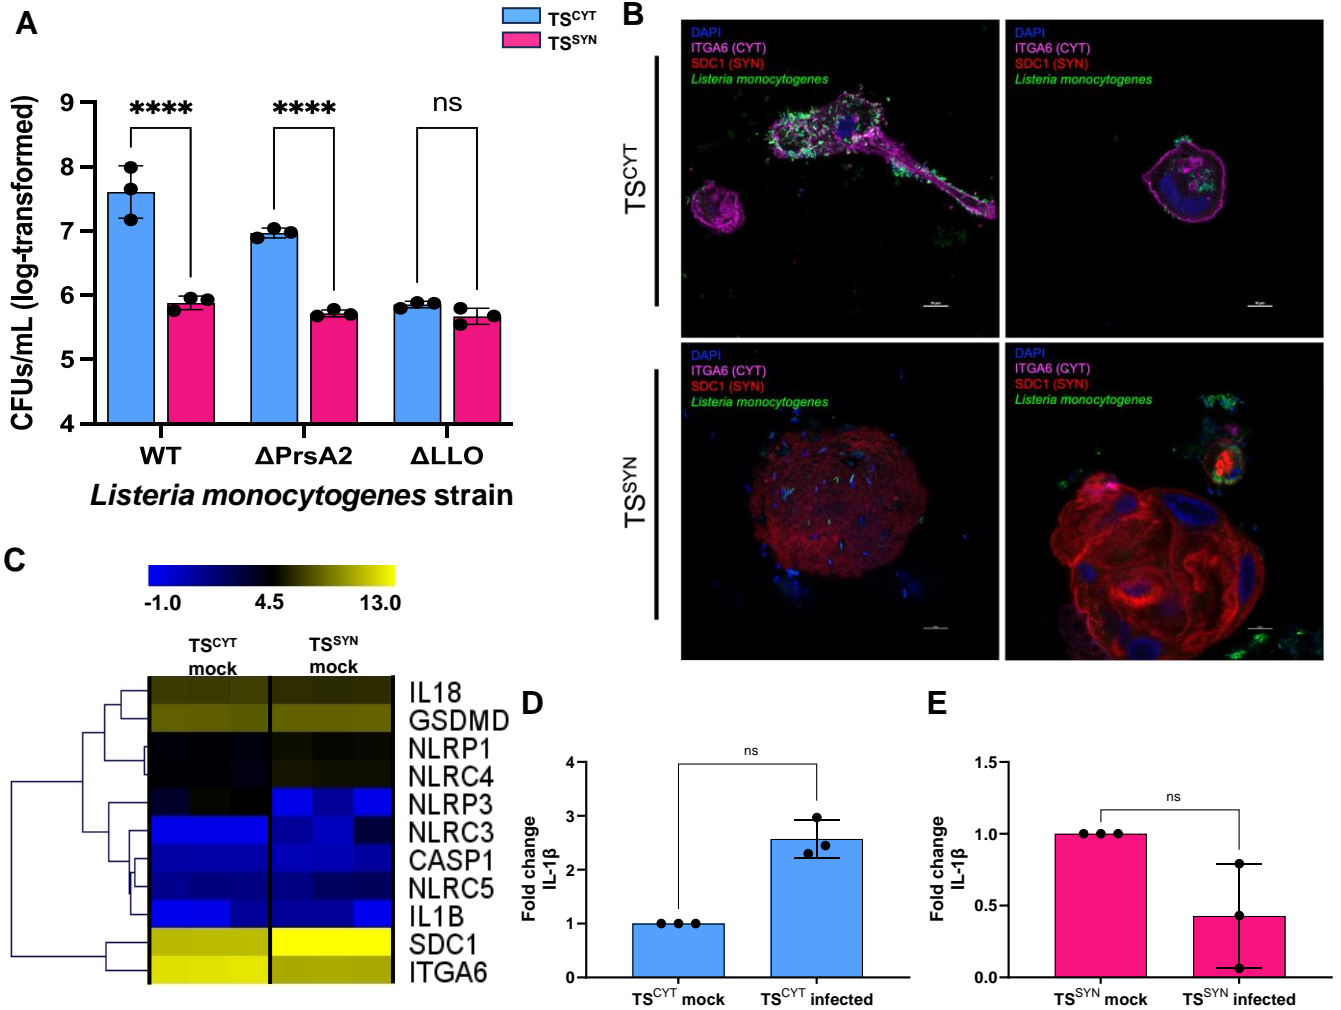

Figure 10

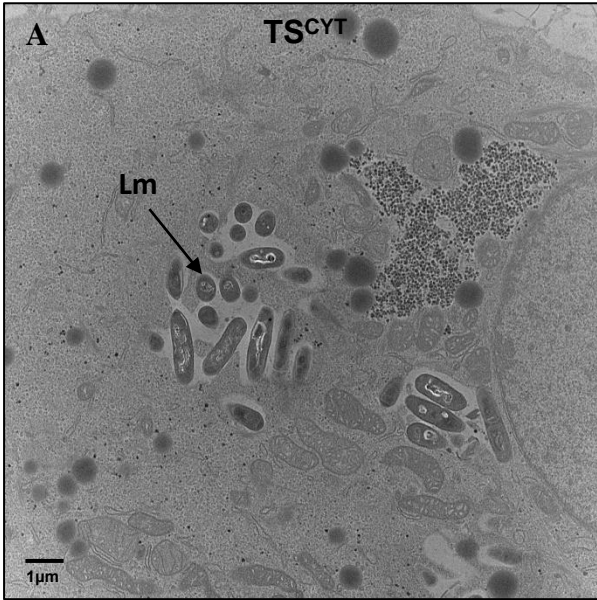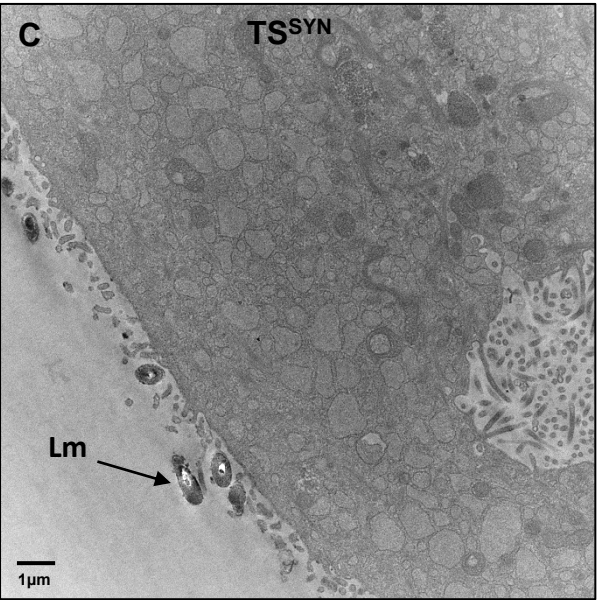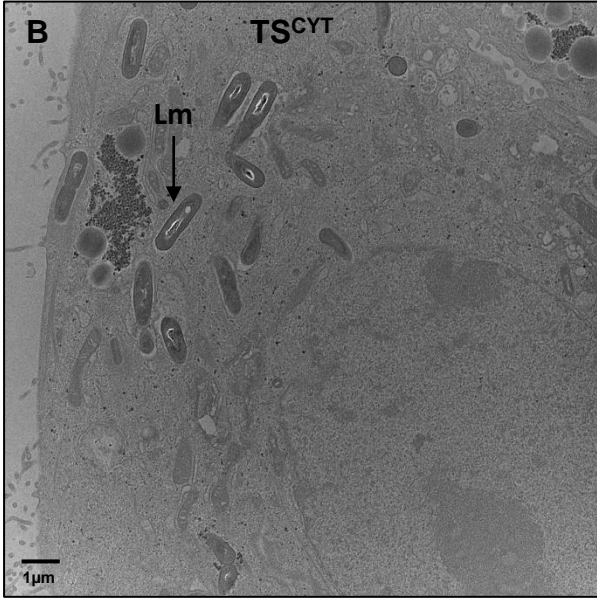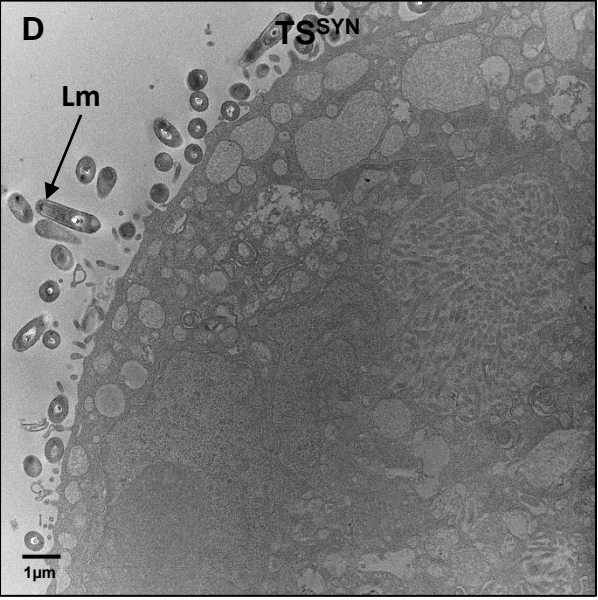

Source: https://www.biorxiv.org/content/10.1101/2023.11.10.566663.full.pdf
